Version dated: November 23, 2017

NON-RANDOM EXTINCTIONS AND PHYLOGENETIC DIVERSITY

**Ranked tree shapes, non-random extinctions and the loss of  
phylogenetic diversity**

ODILE MALIET<sup>1,2,3,†</sup>, FANNY GASCUEL<sup>1,2,3</sup>, AND AMAURY LAMBERT<sup>1,4</sup>

<sup>1</sup> *Center for Interdisciplinary Research in Biology (CIRB), College de France, CNRS, INSERM,  
PSL Research University, Paris, France;*

<sup>2</sup> *Institut de Biologie de l'École Normale Supérieure (IBENS), École Normale Supérieure, CNRS,  
INSERM, PSL Research University, Paris, France;*

<sup>3</sup> *Sorbonne Universités, UPMC Univ Paris 06, ED 227, Paris, France;*

<sup>4</sup> *Sorbonne Universités, UPMC Univ Paris 06, CNRS, Laboratoire Probabilités et Modèles  
Aléatoires, Paris, France;*

**† Corresponding author:** *Odile Maliet, Institut de Biologie de l'École Normale Supérieure,  
équipe 'Modélisation de la biodiversité', École Normale Supérieure, 46 rue d'Ulm, 75005 Paris,  
France; E-mail: odile.maliet@orange.fr.*

*Abstract.*—

Phylogenetic diversity (PD) is a measure of the evolutionary legacy of a group of species, which can be used to define conservation priorities. It has been shown that an important loss of species diversity can sometimes lead to a much less important loss of PD, depending on the topology of the species tree and on the distribution of its branch lengths.

21 However, the rate of decrease of PD strongly depends on the relative depths of the nodes in  
22 the tree and on the order in which species become extinct. We introduce a new,  
23 sampling-consistent, three-parameter model generating random trees with covarying  
24 topology, clade relative depths and clade relative extinction risks. This model can be seen  
25 as an extension to Aldous' one parameter splitting model ( $\beta$ , which controls for tree  
26 balance) with two additional parameters: a new parameter  $\alpha$  quantifying the correlation  
27 between the richness of a clade and its relative depth, and a parameter  $\eta$  quantifying the  
28 correlation between the richness of a clade and its frequency (relative abundance or range),  
29 taken herein as a proxy for its overall extinction risk. We show on simulated phylogenies  
30 that loss of PD depends on the combined effect of all three parameters,  $\beta$ ,  $\alpha$  and  $\eta$ . In  
31 particular, PD may decrease as fast as species diversity when high extinction risks are  
32 clustered within small, old clades, corresponding to a parameter range that we term the  
33 'thin ice zone' ( $\beta < -1$  or  $\alpha < 0$ ;  $\eta > 1$ ). Besides, when high extinction risks are clustered  
34 within large clades, the loss of PD can be higher in trees that are more balanced ( $\beta > 0$ ),  
35 in contrast to the predictions of earlier studies based on simpler models. We propose a  
36 Monte-Carlo algorithm, tested on simulated data, to infer all three parameters. Applying it  
37 to a real dataset comprising 120 bird clades (class Aves) with known range sizes, we show  
38 that parameter estimates precisely fall close to close to a 'thin ice zone': the combination of  
39 their ranking tree shape and non-random extinctions risks makes them prone to a sudden  
40 collapse of PD.

41 (Keywords: Phylogenetic tree, macroevolution, Beta-splitting model, field of bullets model,  
42 broken stick, self-similar fragmentation, sampling distribution, rarefaction, biodiversity)

43

## INTRODUCTION

44 As it becomes increasingly clear that human activities are causing a major  
45 extinction crisis (Leakey and Lewin 1995; Glavin 2007; Wake and Vredenburg 2008;  
46 Barnosky et al. 2011), several theoretical studies have aimed at characterizing how the  
47 evolutionary legacy of parts of the Tree of Life, and hence also the genetic diversity able to  
48 drive future evolution, will decrease in the face of forthcoming extinctions. This  
49 evolutionary component of biodiversity can be measured by the phylogenetic diversity  
50 (PD), defined as the sum of the branch lengths of the phylogeny spanned by a given set of  
51 taxa (Faith 1992). This metric is increasingly being used to measure biodiversity and to  
52 identify conservation strategies (Veron et al. 2015).

53 Nee and May (1997) were the first to formally investigate the expected loss of PD in  
54 the face of species extinctions, by simulating species trees using the Kingman coalescent.  
55 They found that 80% of the phylogenetic diversity can be conserved even when 95% of  
56 species are lost. Further studies showed that the loss of PD is in fact much higher when  
57 trees are generated through other models of species diversification, such as the Yule or the  
58 birth-death models (Mooers et al. 2012; Lambert and Steel 2013). These models indeed  
59 generate longer pendant edges (*i.e.*, branches that lead to the tips), hence lower  
60 phylogenetic redundancy, than in the standard Kingman coalescent (used by Nee and May  
61 1997). However, Nee and May (1997) also showed that phylogenetic diversity is very  
62 sensitive to the shape of the species tree (also called its ‘topology’), with extremely  
63 unbalanced trees (‘comb trees’) losing much more phylogenetic diversity than balanced  
64 trees (‘bush trees’), due to a lack of phylogenetic redundancy (*i.e.*, the presence of recently  
65 diverged sister species). Overall, these results highlighted the sensitivity of the loss of  
66 phylogenetic diversity in response to species extinctions to both edge lengths and tree  
67 shape.

68 In this line, we also expect the correlation between the species richness of clades and  
69 their relative ages to have a significant impact on the loss of PD ('clade' standing here for  
70 any subtree within the full phylogeny). Here the age of a clade, also called 'stem age',  
71 denotes the depth (measured from the present) of its root node (*i.e.*, the node where this  
72 clade is tied to the rest of the tree). Under random extinction, since smaller clades are  
73 more likely to become extinct first, the consequence of their total extinction on PD will  
74 depend on the lengths of pendant edges in these clades compared to those in larger clades.  
75 The effect of such correlation on the loss of PD has not yet been explored, but should be  
76 particularly important in unbalanced phylogenetic trees (exhibiting large variation in the  
77 species richness of clades), which dominate empirical data (*e.g.*, Guyer and Slowinski 1991;  
78 Heard 1992; Guyer and Slowinski 1993; Slowinski and Guyer 1993; Mooers 1995; Purvis  
79 1996; Mooers and Heard 1997; Blum and François 2006).

80 Besides, the loss of PD was shown to be influenced by the distribution of extinction  
81 risks within species trees. Several studies showed that accounting for realistic scenarios of  
82 species extinctions (considering that species with higher extinction risk—as per the IUCN  
83 Red List status—are more likely to go extinct first) predicts proportionately higher losses in  
84 PD than scenarios with random extinction risks (*e.g.* and review, Purvis et al. 2000a; von  
85 Euler 2001; Purvis 2008; Veron et al. 2015). Extinctions may for example be clustered  
86 within certain clades (Bennett and Owens 1997; McKinney 1997; Russell et al. 1998; Purvis  
87 et al. 2000a; Baillie et al. 2004; Bielby et al. 2006; Fritz and Purvis 2010), correlated to the  
88 age of clades (von Euler 2001; Johnson et al. 2002; Redding and Mooers 2006), or to the  
89 species richness of clades (Russell et al. 1998; Hughes 1999; Purvis et al. 2000a; Schwartz  
90 and Simberloff 2001; von Euler 2001; Johnson et al. 2002; Lozano and Schwartz 2005,  
91 assuming in some studies a correlation between rarity and extinction risks). In contrast,  
92 theoretical analyses of predictions based on model trees (Nee and May 1997; Mooers et al.  
93 2012; Lambert and Steel 2013) have all been based so far on the field of bullets model,

94 which considers equal extinction probabilities across species (Raup et al. 1973; Van Valen  
95 1976; Nee and May 1997; Vazquez and Gittleman 1998). One can assume extinction events  
96 are independent but not identically distributed across species, as considered in the  
97 generalized field of bullets model (Faller et al. 2008). In an exchangeable phylogenetic  
98 model in which extinction probabilities are themselves random and independent with the  
99 same distribution, this would not affect the overall loss of phylogenetic diversity (as both  
100 models are stochastically equivalent, Lambert and Steel 2013). However, as stated by  
101 Faller et al. (2008), it is essential to explore models that weaken the strong assumption in  
102 the (generalized) field of bullets models that extinction events are randomly and  
103 independently distributed among the tips of phylogenetic trees.

104 Here, we hence investigate how the loss of PD is influenced by the two  
105 abovementioned factors: (i) the ranked shape of the species tree, considering notably  
106 correlations between clade richness and clade depth, and (ii) non-random extinctions,  
107 considering notably correlations between clade richness and extinction risks within the  
108 clade. Here, ‘ranked shape’ refers to the shape of the tree combined with the additional  
109 knowledge of relative depths—the order in which nodes appear in the tree, but to the  
110 exclusion of the actual divergence times(*e.g.*, Lambert et al. 2017).

111 We introduce a three-parameter model generating random ranked tree shapes  
112 endowed with random numbers summing to one at the tips, interpreted as relative  
113 abundances (or geographic ranges) of contemporary species. This model can be seen as an  
114 extension to Aldous’  $\beta$ -splitting model (Aldous 1996, 2001) with two additional  
115 parameters: a parameter  $\alpha$  quantifying the correlation between clade richness and clade  
116 relative depth (*i.e.*, the rank in time of its root node; termed ‘correlation clade size-depth’  
117 hereafter), and another parameter  $\eta$  quantifying the correlation between clade richness and  
118 its frequency (*i.e.*, its relative abundance compared to that of all extant species in the  
119 phylogeny; termed ‘correlation clade size-frequency’ hereafter). When  $\beta = 0$  and  $\alpha = 1$ , the

120 ranked shape of the tree is the same as the ranked shape of a standard coalescent tree or of  
121 a Yule tree stopped at a fixed time (see Proposition 1 in Appendix 1). We further assume  
122 that contemporary extinctions occur sequentially by increasing order of abundance, which  
123 roughly reduces to the field of bullets model when  $\eta = 1$  (see Proposition 2 in Appendix 1).

124 We explore the rate of decrease of PD as species sequentially become extinct, based  
125 on simulated data under variation in all three parameters over a significant range of their  
126 possible values. Interestingly, the joint variation of the parameter  $\eta$  with the ranked shape  
127 of species trees (set by parameters  $\beta$  and  $\alpha$ ) affects the clustering of extinction risks and  
128 the relationship between extinction risks and clade depth (determined by the similarity or  
129 dissimilarity of the direction of deviations of  $\alpha$  and  $\eta$  from 1). Therefore, considering  
130 simultaneous variation in  $\beta$ ,  $\alpha$  and  $\eta$  allows us to explore the effects on the loss of PD of  
131 the different patterns of non-random extinctions observed in empirical data. We therefore  
132 provide general predictions on the sensitivity of the evolutionary legacy of clades to  
133 extinction, as a function of three simple statistics summarizing tree balance, ranked tree  
134 shape and the distribution of extinction risks across clades.

135 Besides, we then propose a Monte-Carlo inference algorithm enabling maximum  
136 likelihood estimation of the parameters  $\beta$ ,  $\alpha$  and  $\eta$  from real datasets. When tested against  
137 simulated data, this algorithm performs reasonably well over a wide range of parameter  
138 values for phylogenies with 50 tips or more. The estimates of parameters (beta, alpha, eta)  
139 on a real dataset of bird family phylogenies and their range size distributions finally reveal  
140 empirical patterns clustered within a given parameter zone which make these clades  
141 particularly prone to strong loss of phylogenetic diversity.

## 142 METHODS

### 143 *Modeling ranked tree shapes*

144 The first version of the model we present allows one to generate random ranked tree  
145 shapes, that is tree shapes endowed with the additional knowledge of node ranks. Usually,  
146 one can generate random ranked tree shapes by time-continuous branching processes  
147 stopped at some fixed or random time, where particles are endowed with a heritable trait  
148 influencing birth and death rates. In these models, it is generally not possible to  
149 characterize the distribution of the tree shape (for an exception, see Sainudiin and Véber  
150 2016) or to relate it to known distributions whenever it does not have the shape of the Yule  
151 tree (*i.e.*, the tree generated by a pure-birth process). Also, since the same trait is usually  
152 responsible for both the tree shape and the order of nodes, it is impossible to disentangle  
153 the roles of either of these characteristics on the behavior of the tree in the face of current  
154 extinctions. Last, these models do not fulfill a very important property called sampling  
155 consistency (usually considered in combination with exchangeability, *i.e.*, ecological  
156 equivalence between species). This property ensures that one can equivalently draw a  
157 random tree with  $n$  tips from the distribution or draw a tree with  $n + 1$  tips and then  
158 remove one tip at random.

159 The model we propose here has two parameters:  $\beta \in (-2, +\infty)$  determines the  
160 balance of the tree, similarly as in Aldous'  $\beta$ -splitting model (Aldous 1996, 2001), and  
161  $\alpha \in (-\infty, +\infty)$  sets the correlation between species richnesses of clades and their relative  
162 depths (Fig. 2).

163 The construction of a tree according to this model is done by following the steps  
164 indicated hereunder (illustrated on Fig. 1). We start with  $n$  uniform, independent random  
165 variables  $(U_i)_{i \in \{1, \dots, n\}}$  in the interval  $[0, 1]$ . Each mark  $U_i$  is associated to the tip species  
166 labelled  $i$  in the phylogeny. The procedure consists in sequentially partitioning  $[0, 1]$  into a  
167 finite subdivision thanks to random variables independent of the marks  $(U_i)_{i \in \{1, \dots, n\}}$ , until  
168 all marks are in distinct components of the partition. At each step, the new point added to  
169 the subdivision corresponds to a split event in the tree. In the beginning, there is only one

170 component in the partition (the interval  $[0, 1]$  itself).

- 171 1. Each interval  $X$  of the partition containing at least two marks among the  $(U_i)_{i \in \{1, \dots, n\}}$   
172 is given a weight equal to  $|X|^\alpha$ , where  $|X|$  denotes the width of  $X$ . Then one of these  
173 intervals is selected with a probability proportional to its weight.
- 174 2. Draw a random variable  $R$  in a Beta distribution with parameters  $(\beta + 1, \beta + 1)$ . The  
175 selected interval  $X$  of width  $|X|$  is then split into two disjoint subintervals,  $X_{left}$  and  
176  $X_{right}$ , with widths  $|X_{left}| = R|X|$  and  $|X_{right}| = (1 - R)|X|$ . Each subinterval  
177 contains a distinct subset of the marks. The marks in the subinterval  $X_{left}$  determine  
178 the tips in the left subtree of the phylogeny, and the marks in the subinterval  $X_{right}$   
179 determine the tips in the right subtree. This step is performed even if one subinterval  
180 contains no mark among the  $(U_i)_{i \in \{1, \dots, n\}}$ , which corresponds to a subtree with no  
181 sampled species. The order in which the splitting subintervals are selected sets the  
182 order of branching events (*i.e.*, nodes) in the tree.
- 183 3. If no interval contains more than one mark, the process is stopped. Otherwise, go to  
184 Step 1.

185 We can relate the tree shape in this model to well-known distributions. Because  $\alpha$   
186 has no impact on the way we refine the subdivision, the tree shape generated with our  
187 model coincides with the tree shape with parameter  $\beta$  in Aldous'  $\beta$ -splitting model (Aldous  
188 1996, 2001). For small values of  $\beta$ , the intervals are often split close to an edge, and the  
189 resulting tree is imbalanced, converging to the perfectly imbalanced 'comb' tree as  $\beta \rightarrow -2$ .  
190 On the contrary, for large values of  $\beta$ , the intervals are often split close to the middle, and  
191 the resulting tree is balanced. We stress that unlike most models,  $\alpha$  can be tuned  
192 independently of  $\beta$ , allowing node ranks to vary while keeping the same tree shape. For  
193 small values of  $\alpha$  (in particular  $\alpha < 0$ ), the smallest subintervals have a higher probability



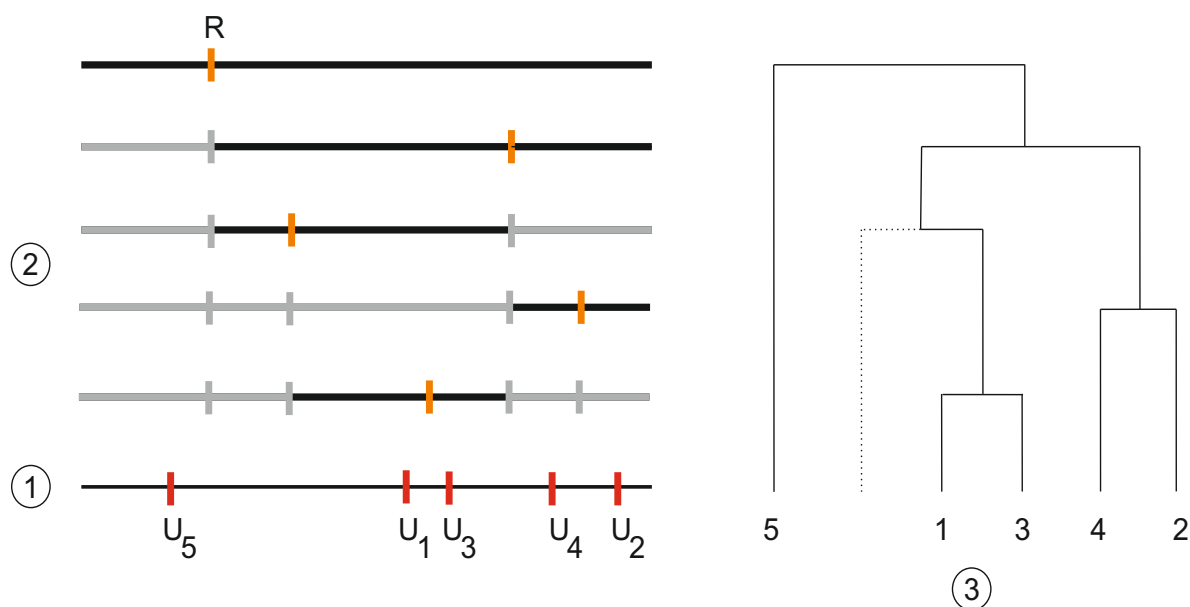

**FIGURE 1: Illustration of the model generating ranked tree shapes.** Construction of the ranked shape of a tree containing  $N = 5$  species. (1) Five random marks  $(U_i)_{i \in \{1, \dots, 5\}}$  are drawn uniformly in the interval  $[0, 1]$  (red marks). (2) At each time step (time flowing downwards), we randomly select one interval  $X$ , with each interval  $X_j$  having a weight  $|X_j|^\alpha$  (in black). Then, we draw a random variable  $R$  in a Beta distribution with parameters  $(\beta + 1, \beta + 1)$ , and split the selected interval  $X$  into two subintervals,  $X_{left}$  of size  $R|X|$  and  $X_{right}$  of size  $(1 - R)|X|$  (orange mark). (3) Repeating this process over time until all intervals  $X_j$  contain only one mark leads a tree with a ranked shape. Dotted branches correspond to unsampled subtrees (*i.e.* there is no mark in the corresponding interval).

194 of being selected, so smaller clades tend to be older. On the contrary, for large values of  $\alpha$ ,  
 195 the largest subintervals have a higher probability of being selected, so smaller clades tend to  
 196 be younger. We notice that as  $\beta$  gets close to  $-2$  the effect of  $\alpha$  vanishes, since at all times  
 197 there is merely one edge that can split. In maximally unbalanced tree shape ( $\beta = -2$ ),  
 198 there is only one ranked tree shape and the order of nodes is fixed, so  $\alpha$  plays no role.

199 As is well-known, the tree obtained with  $\beta = 0$  has the same shape as the tree  
 200 generated with the Yule process (Yule 1925) or the Kingman coalescent (Kingman 1982)  
 201 after ignoring node ranks (Nee 2006; Lambert and Stadler 2013). When  $\alpha = 1$  in addition

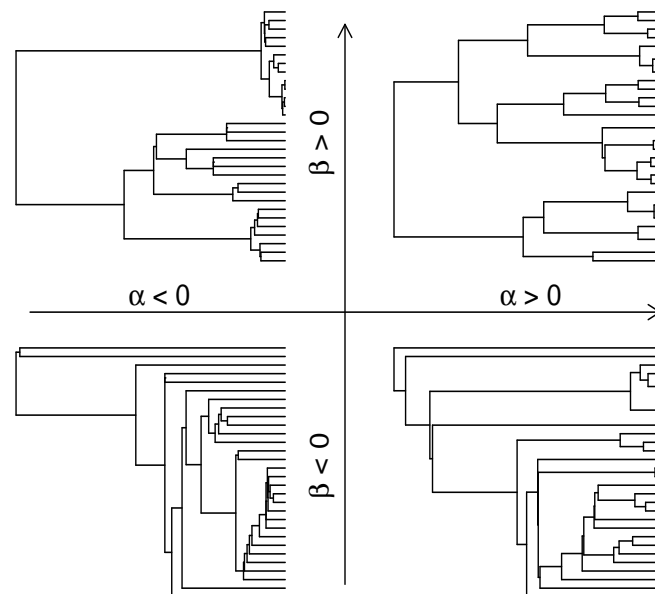

FIGURE 2: **Phylogenetic trees simulated for different values of  $\beta$  (tree balance) and  $\alpha$  (correlation clade size-age).** Node depths are set as in a Yule pure-birth process. Parameter values:  $\beta = -1.5$  (bottom) or 10 (top),  $\alpha = -10$  (left) or 10 (right), number of species  $N = 30$ ,  $\epsilon = 0.001$ .

202 to  $\beta = 0$ , we show in Appendix 1 (Proposition 1), available in Supplementary Materials,  
 203 that our model generates the same tree shape with node ranks as Yule trees, which is  
 204 actually known to be the same as the ranked tree shape of the Kingman coalescent tree.

205 The version of the model we present here only allows simulation of trees with  
 206  $\beta > -1$ , as the Beta distribution is only defined for positive parameter values. Actually,  
 207 our model coincides with the ranked tree in a self-similar, binary fragmentation with  
 208 self-similarity index  $\alpha$  and with fragmentation measure  $\int_0^1 \delta_{(x,1-x,0,0,\dots)} x^{\beta+1} (1-x)^{\beta+1} dx$  (as  
 209 defined in Bertoin 2002, 2006), which makes sense as soon as  $\beta > -2$ . In Appendix 1 (see  
 210 in particular Proposition 3), we present an algorithm based on fragmentation processes  
 211 equivalent to that presented above (using one additional approximation parameter  $\epsilon$ ,  
 212 consistently set to 0.001). Albeit less intuitive, this method allows us to simulate trees for  
 213 all  $\beta > -2$ .

214 Last, it is important to notice that our model is both exchangeable and sampling  
215 consistent. It is exchangeable because labels can be swapped without changing the  
216 distribution of the tree, since marks all have the same distribution. It is sampling  
217 consistent because removing tip labelled  $n + 1$  (or any other tip, by exchangeability)  
218 amounts to removing mark  $U_{n+1}$ , which does not modify the ranked tree shape obtained  
219 from marks  $(U_i)_{i \in \{1, \dots, n\}}$ .

### 220 *Incorporating non-random extinctions*

In order to map each clade of our random phylogeny to its frequency (*i.e.*, relative abundance or relative range size), we add, into a second version of the model, a new parameter  $\eta \geq 0$ . Each time an interval  $X$  is split into two subintervals,  $X_{left}$  and  $X_{right}$  with widths  $|X_{left}| = R|X|$  and  $|X_{right}| = (1 - R)|X|$ , each of the two subtrees is granted a part of the abundance  $A_X$  of the parental clade equal to

$$A_{X_{left}} = \frac{|X_{left}|^\eta}{|X_{left}|^\eta + |X_{right}|^\eta} A_X = \frac{R^\eta}{R^\eta + (1 - R)^\eta} A_X$$
$$A_{X_{right}} = \frac{|X_{right}|^\eta}{|X_{left}|^\eta + |X_{right}|^\eta} A_X = \frac{(1 - R)^\eta}{R^\eta + (1 - R)^\eta} A_X$$

221 This way of allocating frequencies to taxa is reminiscent of the ‘broken stick model’  
222 (MacArthur 1957; MacArthur and Wilson 1967; Colwell and Lees 2000), where the unit  
223 interval is broken into subintervals each representing the frequency or resource share of  
224 each species or clade in the community. This is usually done by throwing uniform points  
225 independently in the interval or by throwing the points sequentially, always to the right of  
226 the last one, leading to the Poisson–Dirichlet distribution appearing in mathematical  
227 population genetics (Feng 2010; Ewens 2012) as well as in the neutral theory of biodiversity  
228 (Hubbell 2001).

229           The model remains sampling-consistent insofar as each  $A_X$  is interpreted as the  
230 abundance of a whole clade, that is the sum of abundances of all species belonging to this  
231 clade, present or not in the sample. Sampling consistency now means that generating a  
232 ranked tree shape with relative abundances on  $n$  tips is equivalent to the following process:  
233 generate a ranked tree shape with relative abundances on  $n + 1$  tips, remove one tip at  
234 random and sum the abundance of the removed tip to that of its sister clade (*i.e.*, the clade  
235 descending from the interior node connected to the removed tip by a pendant edge).

236           If  $\eta = 1$ , then  $A_X = |X|$  so that each clade is granted an abundance that is in mean  
237 proportional to its richness, which means each tip gets the same abundance on average.  
238 When  $\eta > 1$ , the largest of the two daughter clades gets a share of the abundance that is  
239 (in mean) more than its share in species richness, so species in large clades tend to be more  
240 abundant than species in small clades; the opposite happens for  $\eta < 1$ , and species in small  
241 clades tend to be more abundant than species in large clades. Variance in species  
242 abundances increases with  $|\eta|$ . Simulations of species relative abundance (or range)  
243 distributions are shown for different values of  $\eta$  in Figure 3 and in Appendix 1.

244           In the extinction numerical experiment, we determine the order of species  
245 extinctions deterministically based on their rank in abundance: the rarer species are the  
246 first ones to go extinct, whereas more frequent species go extinct last (Fig. 3). The case  
247  $\eta = 1$  where each tip gets the same abundance on average is roughly equivalent to the field  
248 of bullets model of extinction (see Proposition 2 in Appendix 1; in the case  $\beta = -1$ , the  
249 equivalence is exact). This modeling approach allows us to tune the sign and strength of  
250 the correlation between the richness of a clade and the extinction risk of its species.

### 251           *Testing the effect of $\beta$ , $\alpha$ and $\eta$ on PD loss*

252           The effect of all three model parameters on the relationship between species loss  
253 and PD loss is studied in a systematic way by simulation. We considered values of  $\beta$  in

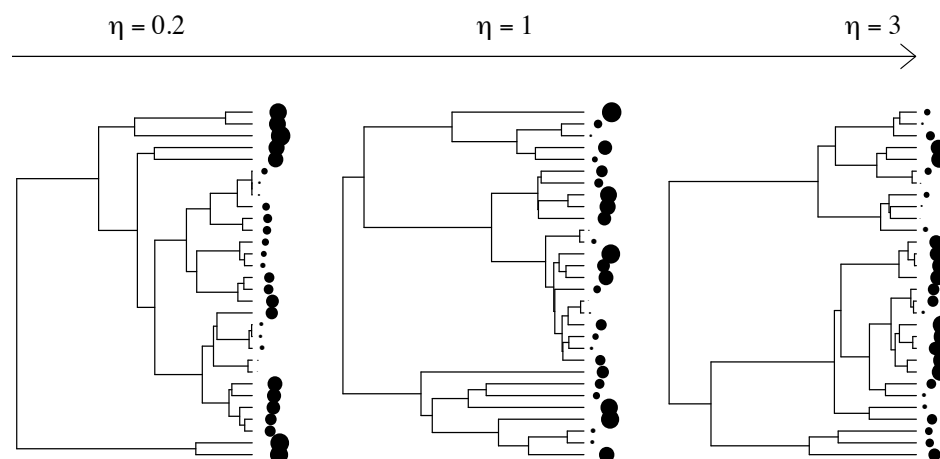

FIGURE 3: **Distribution of species frequencies across the tips of phylogenetic trees for different values of  $\eta$  (correlation clade size-frequency).** Dot sizes sort species according to their frequency (larger dots for more abundant species). Parameter values:  $\eta = 0.2, 1$  or  $3$  (from left to right),  $\beta = 0$ ,  $\alpha = 0$ , number of species  $N = 30$ ,  $\epsilon = 0.001$ . Results with  $\beta = -1.9$  are shown in the online Appendix 1 available as Supplementary Material.

254  $(-2, 10]$ , values of  $\alpha$  in  $[-3, 3]$  and  $\eta$  in  $[0.1, 3]$ . Because our model specifies how interior  
255 nodes are ranked in time but not their actual timing, we use a pure-birth process to  
256 generate node depths, adding the latter on top of ranked tree shapes. The use of another  
257 model for generating node depths leads to qualitatively similar results, albeit quantitatively  
258 different (as an illustration, we show results with edge lengths set as in the Kingman  
259 coalescent in Appendices 4 and 6, available as Supplementary Material).

260 For each set of parameter values, we generated one hundred trees with one hundred  
261 tips ( $N = 100$ ). We sequentially removed extinct species from these trees (in the order of  
262 increasing species abundances, as explained earlier), and computed the remaining PD (sum  
263 of all branch lengths; Faith 1992) for increasing fractions of extinct species.

### 264 *Parameter inference*

265 We inferred the parameters  $\beta$ ,  $\alpha$  and/or  $\eta$  from simulated or empirical datasets by  
266 maximum likelihood. As is already well-known (Aldous 1996; Blum and François 2006;

267 Lambert et al. 2017), the likelihood of a labelled tree shape under Aldous'  $\beta$ -splitting  
268 model is explicit. Since the likelihood of the tree shape under our model is the same as in  
269 Aldous' model (and in particular independent of  $\alpha$  and  $\eta$ ) we can use it to estimate  $\beta$ . In  
270 contrast, computing the likelihood of the ranked tree shape requires to follow through time  
271 the lengths of all intervals of the partition containing marks, which may decrease without  
272 separating marks (unsampled species). Given that the likelihood of the ranked tree (with  
273 or without tip abundances) with the additional knowledge of interval lengths is explicit, we  
274 use a Monte-Carlo data augmentation procedure, in which the augmentation data are the  
275 numbers and sizes of unsampled splits on each branch (which allow us to reconstruct the  
276 interval lengths through time). The likelihood of the ranked tree with tip abundances is  
277 then computed by averaging over augmentations, and is optimized over possible values of  
278  $(\alpha, \eta)$ .

279 We first tested our ability to infer the model parameters on simulated trees. To do  
280 so we simulated trees with 20, 50 and 100 tips for all possible combinations of  $\alpha$  in  
281  $\{-1, 0, 1, 2\}$ ,  $\beta$  in  $\{-1, 0, 1\}$  and  $\eta$  in  $\{0.2, 0.5, 1, 1.5, 2\}$ . For each tree size and parameter  
282 combination, we simulated 20 trees with tip abundances, for a total number of 3600 trees.

283 We then inferred the model parameters on these trees and compared them to the  
284 values used in the simulations. The inference of the parameter  $\beta$  was straightforward,  
285 being computed as the maximum likelihood estimate on the interval  $]-2, 10]$  with the  
286 function `maxlik.betasplit` from the R-package `aapTreeshape` (Bortolussi et al. 2006).  
287 The parameters  $\alpha$  and  $\eta$  were estimated with the method introduced hereabove, with  
288 values respectively constrained on the interval  $[-4, 4]$  and  $[0.1, 10]$ . The value of  $\eta$   
289 (minimum size of unsampled splits, see Appendix 1 in the Supplementary Materials) was  
290 here again fixed to 0.001.

291 The validation of this estimation procedure allowed applying it to real bird family  
292 trees. We used the MCC tree from Jetz et al. (2012), and pruned it to keep family level

293 phylogenies. We kept only the phylogenies that included at least 50 species, and used range  
294 sizes from Map of Life (<https://mol.org/>) as tip data. The value of  $\epsilon$  and the constraints  
295 on parameter ranges were here the same as in the test on simulated phylogenies.

296 The model was coded—and the analyses of phylogenetic trees were performed—using  
297 R (R Development Core Team 2012) and the R packages `cubature` (Johnson and  
298 Narasimhan 2013), `ape` (Paradis et al. 2004), `sads` (Prado et al. 2015), `apTreeshape`  
299 (Bortolussi et al. 2006) and `picante` (Kembel et al. 2014).

## 300 RESULTS

### 301 *Influence of ranked tree shape on PD loss*

302 Here we only address the influence of  $\alpha$  on PD loss, assuming a field of bullets  
303 model for species extinctions ( $\eta = 1$ ). The expected PD loss is then a convex function of  
304 the fraction  $p$  of extinct species (as proved mathematically for any binary tree under the  
305 field of bullets model, see Eq (34) in Lambert and Steel 2013), always lying below  $p$  (Fig.  
306 4.A,C,E,G).

307 Consistently with previous studies (Nee and May 1997; von Euler 2001) we find that  
308 when the relation between depths and richnesses of clades is similar as that in Yule trees  
309 ( $\alpha = 1$ ), very unbalanced trees (comb-like trees) lose more PD in the face of species  
310 extinctions than Yule or more balanced trees (Fig. 4.G-H *vs.* A-D, with  $\alpha = 1$ ). The effect  
311 is non-linear in  $\beta$ : the tree shape has little influence on the loss of PD when  $\beta \geq -1$ , but  
312 increases sharply as  $\beta$  decreases from  $-1$  to  $-1.9$  (results as a function of  $\beta$  in Appendix 2,  
313 available as Supplementary Material). Unbalanced tree shapes are associated with the  
314 presence of long edges leading to evolutionary distinct species (Fig. 2). These edges  
315 constitute an important fraction of the phylogenetic diversity in unbalanced species trees,

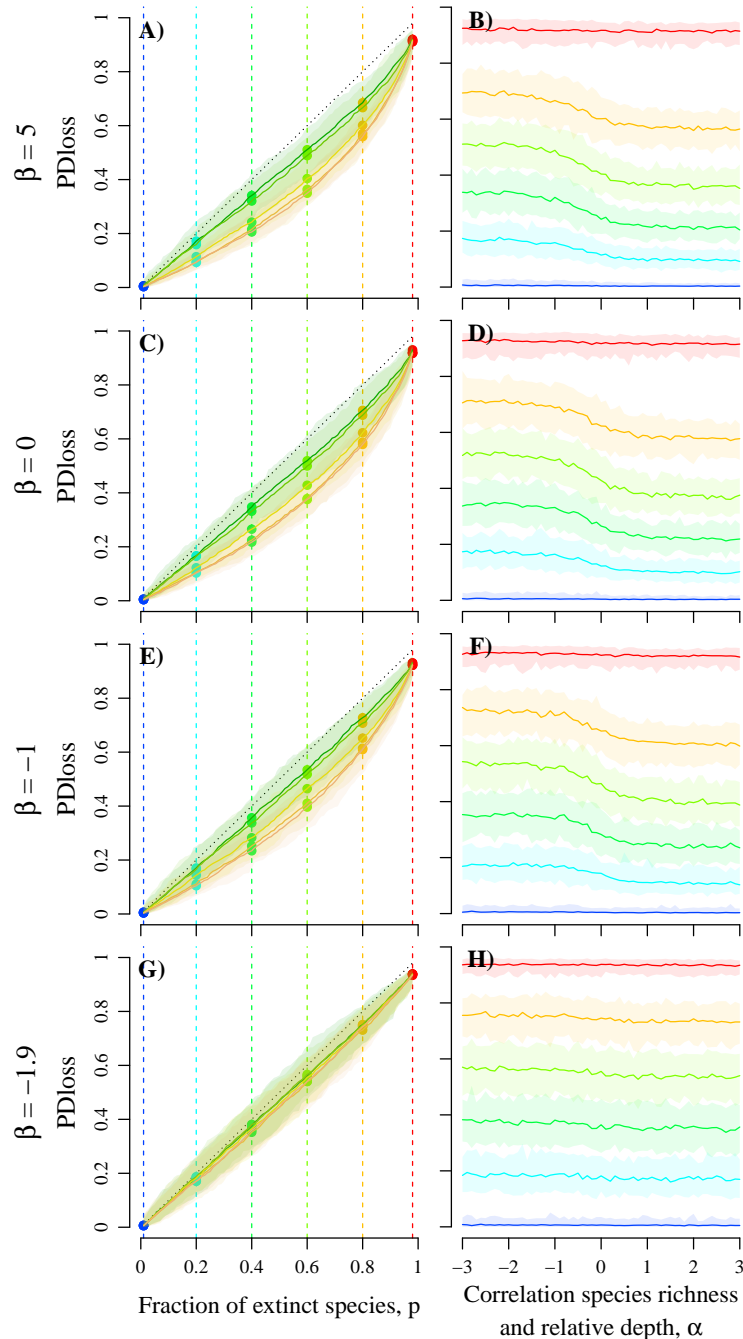

**FIGURE 4: Influence of the ranked tree shape (tree balance  $\beta$  and correlation clade size-age  $\alpha$ ) on phylogenetic diversity (PD) loss, for increasing fractions of species extinctions.** Tree balance  $\beta$  changes from 10 (top row, ‘bush trees’) to  $-1.9$  (bottom row, ‘comb trees’). Results are shown either as a function of the extinction fraction  $p$  (left column; for different  $\alpha$  values) or as a function of  $\alpha$  (right column; for different extinction fractions  $p$ ). Extinction fraction  $p$  increases from 0.01 to 0.98 (from left to right in A, C, E, G; from blue to red in B, D, F, H). The dotted lines in A, C, E, G show the bisector. Results are based on 100 simulation replicates: plain lines give median values and light areas give 95% confidence intervals. Other parameter values: number of species  $N = 100$ ,  $\epsilon = 0.001$ .



316 so that their extinction generates a significant drop in PD. As  $\beta$  gets closer to  $-2$  (case of  
317 the ‘comb tree’), the expected PD loss approaches the fraction of extinct species (Fig. 4.G).

318 Considering ranked tree shapes shows, however, that the order of nodes has a  
319 significant influence on the loss of PD, and on the effect of  $\beta$  on this loss. If the depth and  
320 richness of clades are positively correlated ( $\alpha > 0$ ), the loss of PD is reduced, especially at  
321 intermediate extinction fractions (Fig. 4.A-F). This is because the smallest subtrees, more  
322 prone to early extinction, are younger and hence contain a lower fraction of the  
323 phylogenetic diversity (Fig. 2). If the depth and richness of clades are negatively correlated  
324 ( $\alpha < 0$ ), the loss of PD rises, especially at intermediate extinction fractions. The smallest  
325 subtrees, prone to extinction, are older and hence contain more evolutionary distinct  
326 species (Fig. 2). This generates losses of PD similar to those observed when the tree  
327 shapes are very unbalanced (PD loss equal to the fraction of extinct species).

328 As expected, the effect of  $\alpha$  is evened out in very unbalanced trees ( $\beta$  close to  $-2$ ;  
329 Fig. 4.G-H), for which the loss of PD remains close to its highest value whatever the value  
330 of  $\alpha$ . In the case of the maximally unbalanced tree shape, there is only one ranked tree  
331 shape and the order of nodes is fixed.

332 All these effects of ranked tree shapes on the loss of PD are qualitatively conserved  
333 if node depths are distributed as in the Kingman coalescent (instead of the Yule process).  
334 In the case of Yule trees, PD loss slightly increases with the initial size of the tree, an effect  
335 which is due to more efficient sampling of large values in the common (exponential)  
336 distribution of node depths. Yet the results presented above are qualitatively conserved if  
337 the size of phylogenetic trees changes (analyses performed with number of species  $N = 50$   
338 and  $N = 200$ ; see the online Appendices 3 and 4 available as Supplementary Materials).

### 339 *Influence of non-random extinction risks on PD loss*

340 Correlations between the richness of a clade and its relative abundance (here

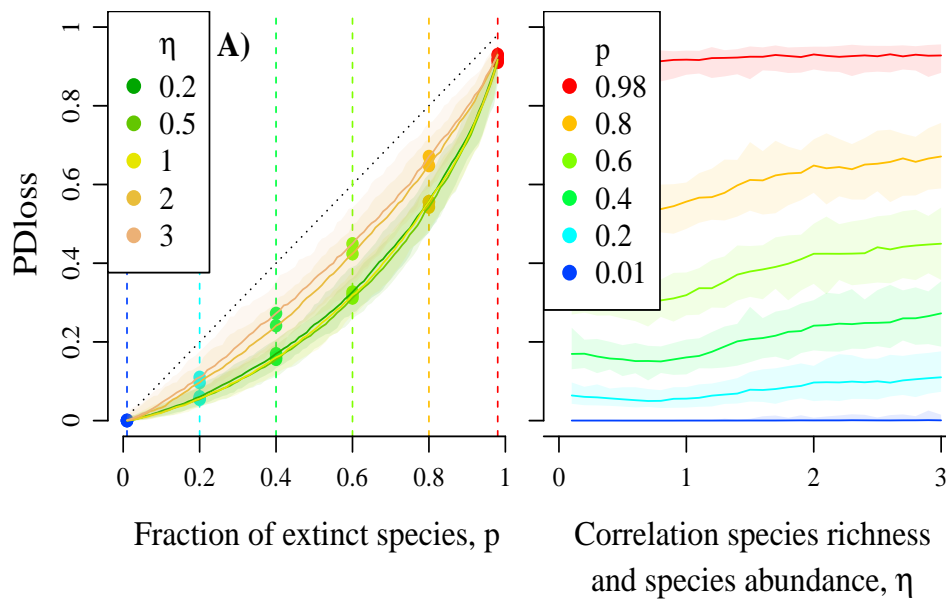

FIGURE 5: **Effect of  $\eta$  (correlation clade size-frequency) on PD loss in Yule trees, for increasing fractions of species extinctions  $p$ .** Results are shown either (A) as a function of the extinction fraction  $p$  (for different  $\eta$  values, with dotted lines showing the bisector) or (B) as a function of  $\eta$  (for extinction fractions  $p$  increasing from 0.01 to 0.98 from blue to red). Results are based on 100 simulation replicates: plain lines give median values and light areas give 95% confidence intervals. Parameter values:  $\beta = 0$ ,  $\alpha = 0$ , number of species  $N = 100$ ,  $\epsilon = 0.001$ .

341 directly influencing the extinction risk of its species) may have a paramount influence on  
 342 the loss of PD in the face of extinctions (Fig. 6). In trees with ranked tree shapes similar  
 343 to Yule trees ( $\beta = 0$ ,  $\alpha = 1$ ), the concentration of high extinction risks in small clades  
 344 ( $\eta > 1$ ) increases the loss of PD, by promoting the extinction of entire clades (Fig. 5). In  
 345 contrast, when extinction risks are higher in larger clades ( $\eta < 1$ ), phylogenetic redundancy  
 346 (and hence the likelihood of conserving at least one species per subtree) limits the loss of  
 347 PD until high extinction levels.

348 The effect of  $\eta$  is modified by the ranked shape of species trees. Correlations  
 349 between clade richness and clade depth (set by  $\alpha$ ) modulate the additional loss of PD  
 350 induced by  $\eta > 1$  (*i.e.* lower abundances in smaller clades; Fig. 6.A-F). When  $\alpha < 0$ ,

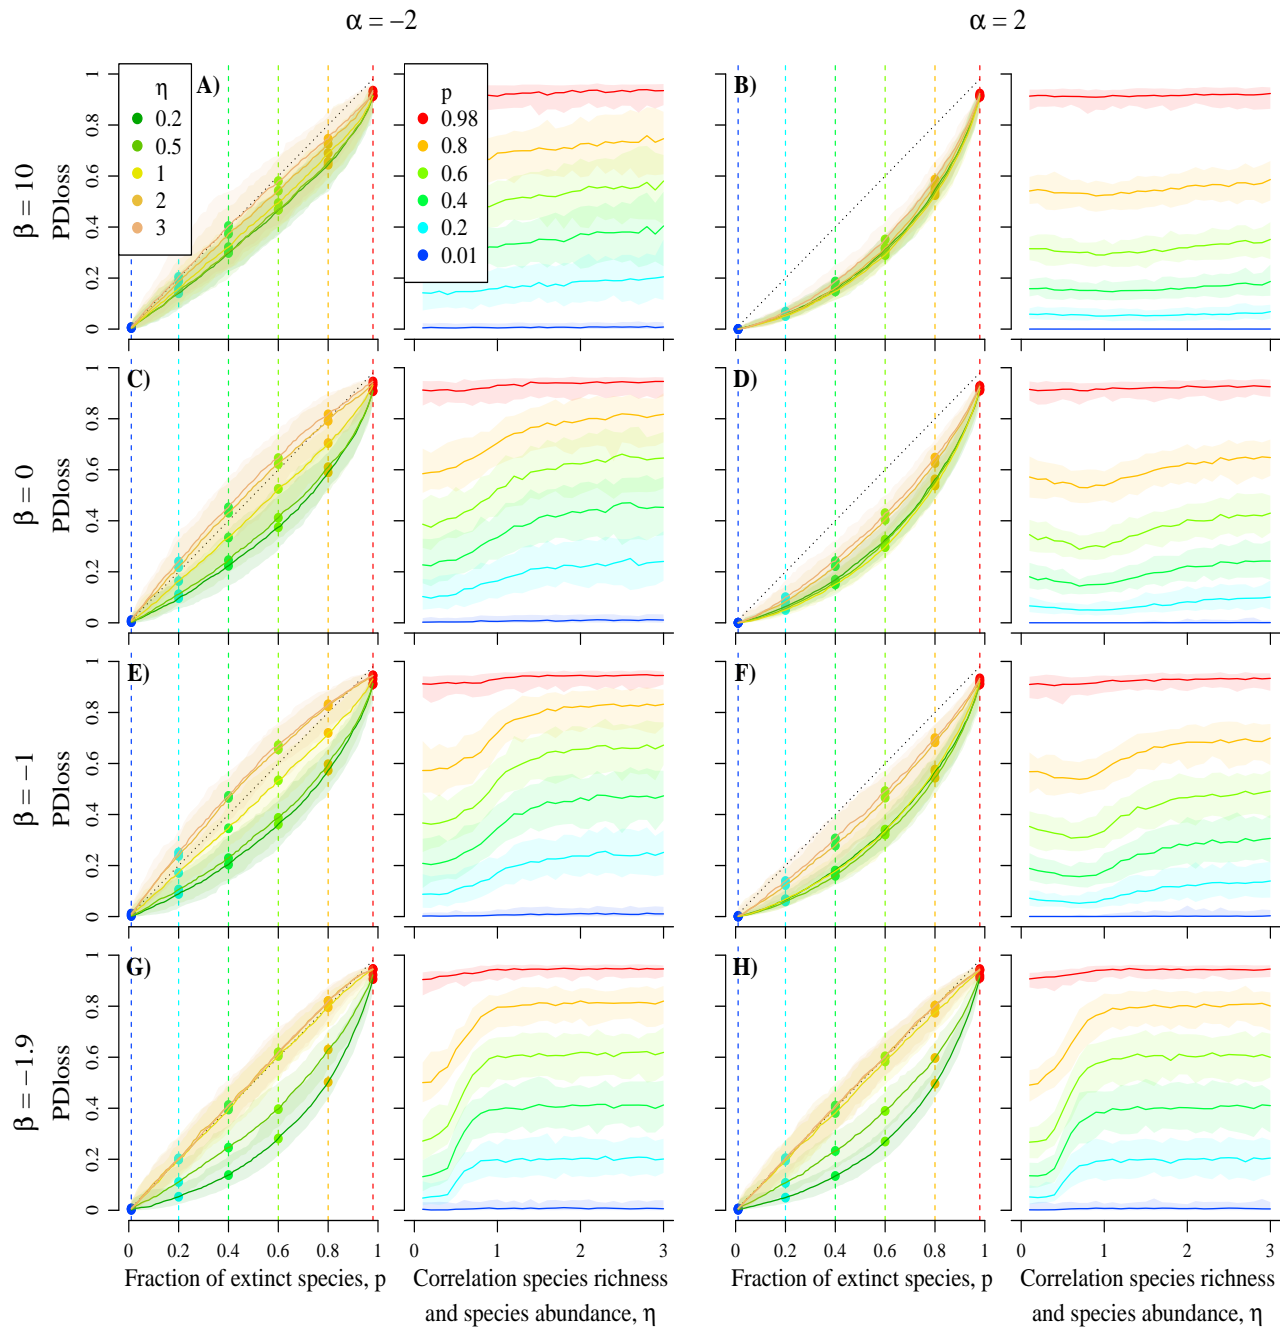

**FIGURE 6: Effect of  $\eta$  (correlation clade size-frequency) on PD loss, for different ranked tree shapes and increasing fractions of species extinctions.** Tree balance  $\beta$  ranges from 10 (top row, ‘bush trees’) to  $-1.9$  (bottom row, ‘comb trees’), and correlation clade size-age  $\alpha$  ranges from  $-2$  (A, C, E, G) to  $2$  (B, D, F, H). Results are shown either as a function of the extinction fraction  $p$  (left side; for different  $\eta$  values, and with dotted lines showing the bisector) or as a function of  $\eta$  (right side; for extinction fractions  $p$  increasing from 0.01 to 0.98 from blue to red). Results are based on 100 simulation replicates: plain lines give median values and light areas give 95% confidence intervals. Other parameter values: number of species  $N = 100$ ,  $\epsilon = 0.001$ .

351 smaller clades are not only more prone to extinction but also have deeper nodes, hence  
352 more evolutionary distinct species, which increases even further the loss of PD. Unlike in  
353 the field of bullets model, the expected PD loss as a function of the fraction  $p$  of extinct  
354 species can even change from convex to concave, and so take values larger than  $p$  (Fig.  
355 6C,E). When  $\alpha > 0$ , smaller clades are more prone to extinction but have shallower nodes,  
356 which counteracts the increase of PD loss due to  $\eta > 1$ . To summarize, PD loss is increased  
357 when  $\eta > 1$  compared to  $\eta = 1$ , with a maximal effect for negative values of  $\alpha$ ,  
358 progressively flattening as  $\alpha$  grows.

359 We call ‘thin ice zone’ the region of parameters corresponding to the theoretical  
360 phylogenies that suffer a maximal rate of PD loss straight from the first few extinction  
361 events, that is, close to 1% of PD lost for the first 1% of species lost. In the plane  $(\alpha, \eta)$ ,  
362 the ‘thin ice zone’ corresponds to  $\{\alpha < 0, \eta > 1\}$ . As testified by Fig. 6, phylogenies in this  
363 zone can even suffer a rate of PD loss which is larger than 1 from the first extinction and  
364 sustains itself above 1 throughout the extinction crisis.

365 In contrast,  $\alpha$  has little effect on the decrease in PD loss induced by  $\eta < 1$  (*i.e.*,  
366 higher abundances in small clades). Indeed, when  $\eta < 1$ , the deepest nodes are always  
367 protected regardless of the value of  $\alpha$ : when  $\alpha < 0$  the deepest nodes are in small clades  
368 which are protected from extinctions by their high relative abundances (due to  $\eta < 1$ );  
369 when  $\alpha > 0$ , the deepest nodes are in large clades which are protected by phylogenetic  
370 redundancy.

371 The influence of  $\eta$  on PD loss is amplified by unbalanced tree shapes ( $\beta < 0$ ; Fig.  
372 6.E-H) and buffered by balanced tree shapes ( $\beta > 0$ ; 6A-B), because lower values of  $\beta$   
373 enhance richness inequalities between clades and raise in turn the influence of  $\eta$  on PD loss.  
374 This interaction between parameters  $\eta$  and  $\beta$  overwhelms the influence of  $\alpha$  (Fig. 6). In  
375 the plane  $(\beta, \eta)$ , the ‘thin ice zone’ is  $\{\beta < -1, \eta > 1\}$  and the previous remark thus  
376 implies that in the three-dimensional parameter space, the thin ice zone is  $\{\alpha < 0$  or

377  $\beta < -1; \eta > 1$ .

378 Interestingly, the effect of  $\beta$  is highly dependent on how extinction risks are  
 379 distributed within the phylogeny (Fig. 7, and results with other  $\alpha$  values in Appendix 7  
 380 available as Supplementary Material). For  $\eta = 1$ , we recover the well-known pattern of  
 381 decreased PD loss as the tree gets more balanced. However, for  $\eta < 1$  we see the reverse  
 382 pattern, that is PD loss increases with the balance of the tree. Recall that  $\eta < 1$  buffers PD  
 383 loss, because extinction risks are clustered in the bigger clades which also display higher  
 384 phylogenetic redundancy (smaller pendant edges). When the tree is maximally unbalanced,  
 385  $\eta < 1$  causes the longest pendant edge to subtend the tip with the largest abundance (and  
 386 hence to be the last to become extinct). Therefore, the order of extinctions coincides  
 387 exactly with the increasing order of pendant edge lengths, which results in minimal PD loss  
 388 for any given level of extinction. In a more balanced phylogeny, the distribution of clade  
 389 sizes is more even and the buffering effect of the clustered extinction on PD loss is reduced.

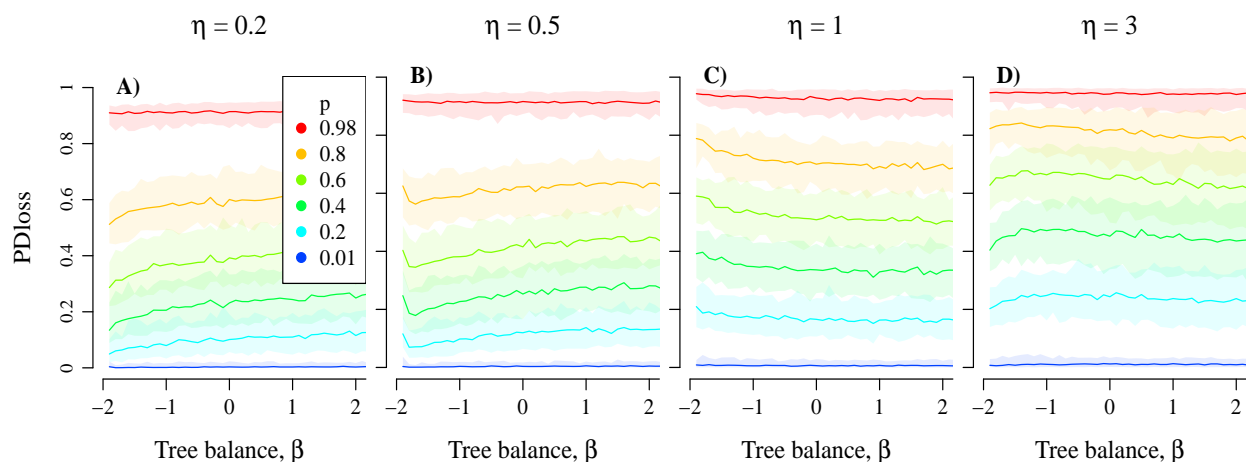

FIGURE 7: **Effect of tree balance  $\beta$  on PD loss, for different correlations clade size-frequency  $\eta$ , and increasing fractions of species extinctions  $p$ .** The correlation clade size-frequency  $\eta$  ranges from 0.2 (left) to 3 (right), and the extinction fraction  $p$  increases from 0.01 to 0.98 (from blue to red). Results are based on 100 simulation replicates: plain lines give median values and light areas give 95% confidence intervals. Other parameter values: clade size-age  $\alpha = -2$ , number of species  $N = 100$ ,  $\epsilon = 0.001$ .

390 For  $\eta > 1$  we again recover the well-known pattern of decreased PD loss with  
391 increasing  $\beta$ . However, when we also have  $\alpha < 0$ , the relationship between PD loss and  $\beta$  is  
392 not monotonic, that is for any particular level of extinction, the maximal PD loss is  
393 reached for trees with intermediate balance. Recall that  $\alpha < 0$  causes small clades to be  
394 relatively older and so to contribute more to PD. The maximal loss of PD thus occurs  
395 when extinction risks cluster in small clades. And indeed, when  $\eta > 1$ , at each splitting  
396 event the species-richer subtree gets a bigger abundance than the species-poorer subtree.  
397 However, within a given clade, the abundance of a species should decrease with the number  
398 of nodes (splitting events) on its lineage. This latter effect is stronger in unbalanced trees;  
399 in balanced trees, extinction risks cannot cluster in small clades, due to the absence of  
400 small clades. Trees with intermediate balance do display small clades, and these small  
401 clades are large enough to share their low abundance ( $\eta > 1$ ) into a few species with very  
402 low abundance. These species go extinct first, resulting in maximal PD loss.

### 403 *Effect of species extinctions on tree shape*

404 We study the effect of species extinctions on tree shape, seeking in particular to  
405 check if the influence of  $\eta$  on the patterns of PD loss can be explained by changes in tree  
406 shape as species go extinct. Fig. 8 shows the imbalance (defined here as the maximum  
407 likelihood estimate  $\hat{\beta}$  of the parameter  $\beta$ ) of the species tree computed after a fraction  $p$  of  
408 its species have become extinct. When  $\eta = 1$ , tree balance is very little altered by  
409 extinctions except in very balanced trees, as predicted by the sampling consistency of the  
410 model ( $\eta = 1$  amounts to removing species at random except when  $\beta \gg 1$ , see Appendix  
411 1). When  $\eta < 1$ , trees tend to become more and more balanced as  $p$  increases ( $\hat{\beta}$  increases  
412 with  $p$ ), whereas when  $\eta > 1$  trees tend to become more and more similar to Yule trees  
413 ( $\hat{\beta} \rightarrow 0$  as  $p \rightarrow 1$ ). The effect of  $\eta$  on PD loss cannot be reduced to its effect on changes in  
414 tree shape due to extinctions. On the one hand,  $\eta$  mostly affects the shape of trees with

415  $\beta > -1$  (Fig. 8), whereas tree shape has most effect on PD loss when  $\beta$  varies between  $-2$   
 416 and  $-1$  (Fig. 4.A,C,E with  $\alpha = 0$ ). In addition, if the effect of  $\eta$  on tree shape had a  
 417 significant influence on PD loss,  $\eta > 1$  should increase this loss when  $\beta > 0$  (by decreasing  
 418 the balance of trees; Fig. 8.D) and decrease it when  $\beta < 0$  (by increasing the balance of  
 419 trees). Yet, the changes we observe in the effect of  $\eta > 1$  on PD loss for different  $\beta$  values  
 420 are the reverse of this prediction. Therefore, the indirect effects of  $\eta$  (through changes in  
 421 tree shape) are negligible compared to its direct effects (through non-random distribution  
 422 of extinction risks).

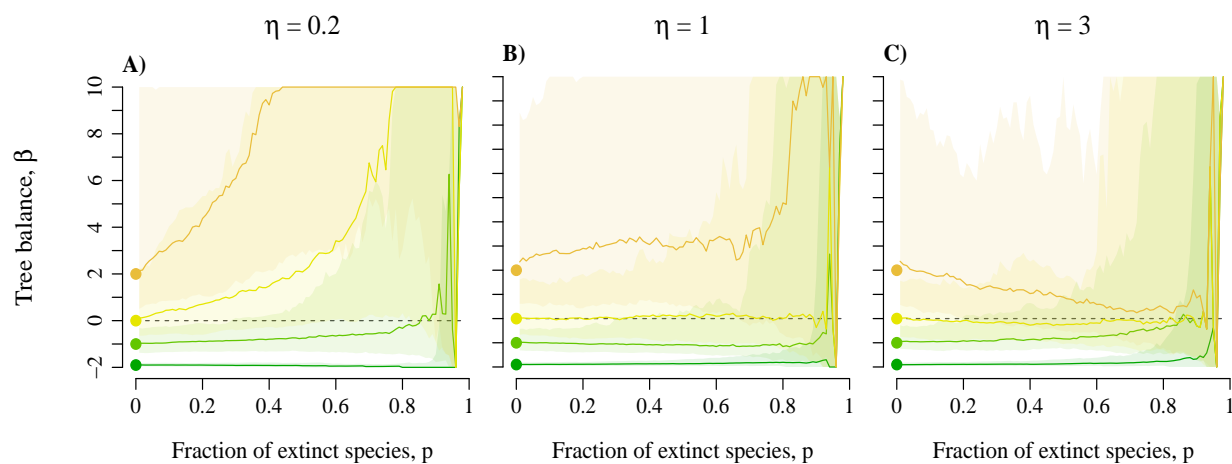

**FIGURE 8: Effect of  $\eta$  (correlation clade size-frequency) on the balance of phylogenetic trees after extinctions (MLE  $\hat{\beta}$  of  $\beta$ ).** Initial tree balance  $\beta$  ranges from 10 (brown dots and lines, ‘bush trees’) to  $-1.9$  (green dots and lines, ‘comb trees’). Extinction fraction  $p$  increases from 0.01 to 0.98 (from left to right). Results are based on 100 simulation replicates: plain lines give median values and light areas give 95% confidence intervals. Other parameter values: number of species  $N = 100$ ,  $\epsilon = 0.001$ ,  $\alpha = 0$ .

423 As precedently results on the effects of non-random extinctions on the loss of  
 424 phylogenetic diversity are conserved when node depths are distributed as in the Kingman  
 425 coalescent, or when the size of phylogenetic trees changes (analyses performed with  $N = 50$   
 426 and  $N = 200$ ; see the online Appendices 5 and 6, available as Supplementary Material).

427 *Parameter inference*

428           When tested against simulated data, the Monte-Carlo inference algorithm by data  
429 augmentation performs reasonably well on phylogenies with more than 50 tips for a wide  
430 range of parameters (see the online Appendix 8, available as Supplementary Material). As  
431 expected, the estimation of  $\beta$  on trees with at least 50 tips is accurate, since the likelihood  
432 formula of the unranked tree is explicit, and this accuracy increases as  $\beta$  decreases. The  
433 inference algorithm also returns overall good estimates of  $\eta$  and  $\alpha$  whenever  $\eta > 0.3$ .

434           The inference of  $\alpha$  is unbiased except in the cases where  $\beta < 0$  and  $\eta < 0.3$ . This  
435 corresponds to cases where the unsampled nodes are numerous because  $\beta$  is small, and they  
436 have a strong impact on the reconstruction of intervals because  $\eta$  is small. The inferred  $\eta$  is  
437 overestimated for trees with only 50 tips. For  $\beta < 0$  and  $\alpha \geq 0$ ,  $\eta$  is slightly overestimated  
438 whatever the tip number. For  $\beta > 0$  and  $\alpha \leq 0$  inferences are good for trees with at least  
439 100 tips.

#### 440           *Empirical values*

441           Estimates of parameter values on real data shows consistent patterns across all bird  
442 family trees. Unsurprisingly, we find negative  $\beta$  values, mostly comprised between 0 and -1,  
443 hence corresponding to unbalanced trees (see online Appendix 9, available as  
444 Supplementary Material). Since the estimation of  $\beta$  is quite accurate for low true values of  
445  $\beta$  and is biased towards larger estimates than the true value otherwise, these estimates can  
446 be taken with confidence. The estimates of  $\eta$  vary between 1 and 1.5. This indicates that,  
447 within bird families, species in small clades tend to have smaller range sizes than species in  
448 larger clades. The above study showed that low  $\eta$  values can be difficult to detect in  
449 unbalanced trees. Yet when this is the case,  $\eta$  is found to be close to the maximal value  
450 allowed in the inference (here 10), which is not the case here. We can therefore be  
451 confident that these values do not reflect a bias in the inference, but reflect a true pattern  
452 in the distribution of range sizes within the phylogenies. Finally, the estimates of  $\alpha$  are



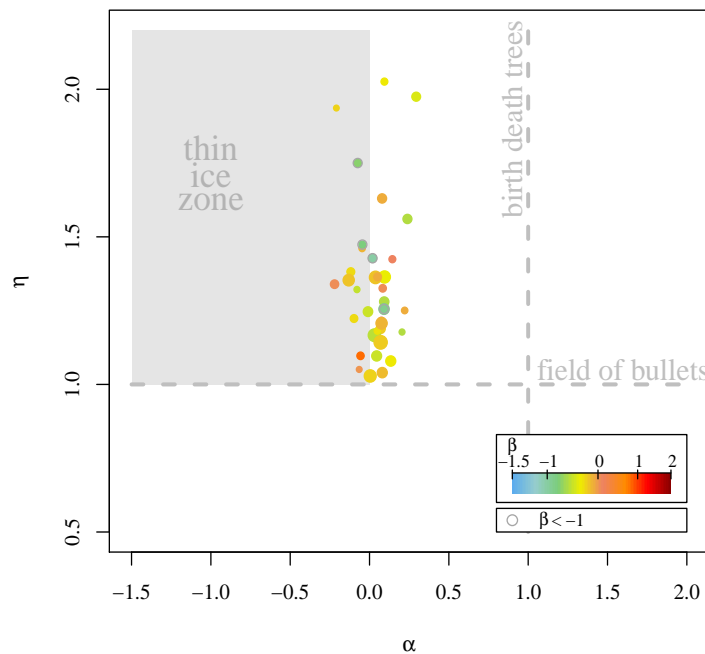

FIGURE 9: **Inferred model parameters on bird family trees of 50 tips or more.**  $\alpha$  maximum posterior estimate (x-axis),  $\eta$  maximum posterior estimate (y-axis) and  $\beta$  maximum likelihood estimate (point color). Point sizes are proportional to the number of tips in trees,  $N$ . The dashed vertical line shows the value of  $\alpha$  for trees generated by a birth-death model, and the dashed horizontal line shows the value of  $\eta$  for which extinction probabilities are distributed within the tree as in a field of bullets model. For all inferences,  $\epsilon$  was set to 0.001.

453 clustered around 0, indicating that there is no correlation between clade  
454 depth within each bird phylogeny. This in contrast with what is expected in most explicit  
455 models of diversification, where larger clades take more time to diversify, resulting in a  
456 strong positive correlation between the depth and the size of clades.

457 When jointly inferring of  $\alpha$  and  $\eta$  the choice to use range size to infer  $\eta$  is likely to  
458 have an impact on the inferred  $\alpha$  (because the values of the intervals are reconstructed  
459 using tip values, inappropriate tip values would lead to uncorrect  $\alpha$ ). Therefore we also  
460 ran the inference of  $\alpha$ : we wind fairly similar results between values obtained with the

461 inference of alpha only compared to the full inference (the median of the inferred  $\alpha$  for  
462 trees with at least 50 tips is 0.19 when  $\alpha$  is inferred alone and 0.05 when both  $\alpha$  and  $\eta$  are  
463 inferred), indicating that tree shape is indeed driving the result (online Appendix 9  
464 available as Supplementary Material equivalent as Fig. 9 with the  $\alpha$  inferred without  
465 knowledge of the tip range sizes).

## 466 DISCUSSION

467 *A new integrative measure of correlation between clade depths and sizes,  $\alpha$*

468 We introduced here a new model for random ranked tree shapes with a fixed,  
469 arbitrary number of tips. This model features two parameters,  $\beta$  and  $\alpha$  tuning respectively  
470 the shape of the tree and the order of its nodes. Trees with  $\beta \leq 0$  are imbalanced and trees  
471 with  $\beta > 0$  are balanced. Whatever the value of  $\alpha$ , the shape of the tree is the same as in  
472 Aldous'  $\beta$ -splitting model (Aldous 1996, 2001). Large clades coalesce deep in the tree when  
473  $\alpha > 0$  and are shallower than smaller clades when  $\alpha < 0$ . When  $\beta = 0$  and  $\alpha = 1$ , the tree  
474 has the same ranked shape as the Kingman coalescent and the Yule tree. In addition, this  
475 model is the first model (except the two aforementioned models and the trivial case of the  
476 'comb tree') for ranked tree shapes satisfying sampling-consistency, in the sense that a tree  
477 with  $n$  tips has the same distribution as a tree with  $n + 1$  tips with one tip removed at  
478 random. This property is essential to ensure the robustness of the model with respect to  
479 incomplete taxon sampling (Heath et al. 2008; Cusimano et al. 2012; Stadler 2013).

480 Predictions from this model highlight the importance of accounting for node ranks  
481 to understand forthcoming changes in macroevolutionary patterns of phylogenetic diversity.  
482 They show in particular that the relationship between the species richness of a clade and  
483 its relative depth in the tree, set by parameter  $\alpha$  in the model, can have profound impacts

484 on the rate of PD loss (Fig. 4). This parameter  $\alpha$  constitutes a new index quantifying the  
485 relationship between the depth and size of clades. A large number of studies already looked  
486 at the depth-size correlation, assessing its existence (significance, sign and pattern) across  
487 multiple phylogenetic trees—based on one value of species richness and crown or stem age  
488 per phylogeny (*e.g.*, Magallon and Sanderson 2001; Bokma 2003; Ricklefs 2006; McPeck  
489 and Brown 2007; Rabosky et al. 2007; Ricklefs 2007a; Rabosky 2009; Rabosky et al. 2012).  
490 These studies notably aimed at testing the hypothesis of time-limited diversity patterns,  
491 versus hypotheses of diversity set by diversification rates or by limits to diversity (McPeck  
492 and Brown 2007; Ricklefs 2007b, 2009; Rabosky 2009; Barraclough 2010; Rabosky 2013).  
493 Our new index  $\alpha$  is different in that it can be measured by maximizing the likelihood on a  
494 single phylogeny, implicitly integrating over all subclades of this phylogeny. An interesting  
495 consequence is that one does not have to choose which clades to include in the analysis.  
496 For example,  $\alpha$  is not sensitive to the definition of higher taxa (Stadler et al. 2014).  
497 Moreover, similarly to the index  $\beta$  (compared to other measures of tree imbalance;  
498 Kirkpatrick and Slatkin 1993; Aldous 1996, 2001),  $\alpha$  is a measure of depth-size correlation  
499 computed as the maximum likelihood estimate of a model-based parameter. Last, we stress  
500 that our model does not require the precise knowledge of node datings in the phylogeny  
501 but only the relative positions of nodes in time, which preserves  $\alpha$  alpha estimates from the  
502 inaccuracies of time calibrations (Kumar 2005; Welch and Bromham 2005; Pulquério and  
503 Nichols 2007; Forest 2009; Schwartz and Mueller 2010).

### 504 *Ranked tree shapes and the loss of phylogenetic diversity*

505 Our results confirm that in the field of bullets model unbalanced trees undergo  
506 stronger loss of PD than balanced trees, under equal fraction of species extinctions. This  
507 property was already well-known (Nee and May 1997), but is important to recall given the  
508 predominance of unbalanced phylogenetic trees in nature ( $\beta$  values being often close to  $-1$ ;

509 *e.g.*, Guyer and Slowinski 1991; Heard 1992; Guyer and Slowinski 1993; Slowinski and  
510 Guyer 1993; Mooers 1995; Purvis 1996; Mooers and Heard 1997; Blum and François 2006).  
511 However, our results also show that the temporal order of nodes among subtrees (set by  
512 the parameter  $\alpha$ ) may have even stronger effects than their distribution among subtrees  
513 (set by parameter  $\beta$ ; compare the effect of the latter in Appendix 2 to that of  $\alpha$  on Fig. 4).  
514 Besides,  $\alpha$  values below 0 cause drops of PD almost as abrupt as those observed with  
515 ‘comb’ shapes ( $\beta$  close to  $-2$ , with  $\alpha = 1$ ; Fig. 4.D,H). It is therefore essential to consider  
516 the ranked shapes of species trees to understand the expected patterns of loss of  
517 phylogenetic diversity.

518 Values of  $\alpha$  deviating from 1 may arise from differences in stages of diversification  
519 among subtrees, resulting from heterogeneity in biotic or abiotic factors acting on  
520 diversification processes in different parts of the species tree. This could be due to bursts of  
521 diversification in certain subtrees (*e.g.*, following from key innovations or from migration to  
522 empty spatial or ecological space), either recently (resulting in  $\alpha < 0$ ) or early in the  
523 history of clades (resulting in  $\alpha > 0$ ). Alternatively,  $\alpha$  values deviating from 1 could be  
524 linked to changes in extinction rates in distinct parts of the tree (*e.g.*, due to changes in  
525 the biotic or abiotic environment of phylogenetically related species sharing similar  
526 ecological niches). Age-dependent speciation (Hagen et al. 2015) and extinction (Alexander  
527 et al. 2015) are also likely to make node ranking deviate from what is expected in a  
528 homogeneous birth-death model. Heterogeneity in diversification rates across the species  
529 tree associated with asymmetric competition among species (*e.g.*, evolutionary advantage  
530 to previously established species) could limit diversification in younger subtrees, hence  
531 leading to  $\alpha > 0$ . Last,  $\alpha$  can be found negative due to the presence of relictual lineages,  
532 *i.e.*, old clades harboring few species surviving to the present.

533 *Modeling non-random extinctions:  $\eta$  and the loss of phylogenetic diversity*

534 The incorporation of parameter  $\eta$  within the framework provided by Aldous'  
535  $\beta$ -splitting model allowed us to go beyond the field of bullets assumption. In passing, we  
536 devised a model of abundance distributions (equivalently interpreted as range size  
537 distributions) covarying with the phylogeny, in the broken-stick tradition (MacArthur 1957;  
538 MacArthur and Wilson 1967). When  $\eta > 1$ , the most abundant species are in species-rich  
539 clades whereas when  $\eta < 1$  the most abundant species are in species-poor clades. When  
540  $\eta = 1$  all species have the same abundance on average. Here, extinctions are assumed to  
541 occur sequentially in the order of increasing abundances. In nature, relative extinction risk  
542 indeed depends on species frequency, but also on many other features (*e.g.*, dynamics of  
543 population growth or decline, fragmentation into subpopulations, biotic or abiotic changes ;  
544 IUCN 2012), and may have a significant stochastic component. The simple framework we  
545 use to determine extinctions allows us to focus on the direct impact of the distribution of  
546 ranked abundances within trees on the loss of phylogenetic diversity. This framework can  
547 easily be modified to include extrinsic causes of extinctions.

548 Previous studies concluded that PD loss is increased if extinction risks are clustered  
549 in the phylogeny (Davies and Yessoufou 2013), but that this effect is not substantial  
550 (Parhar and Mooers 2011). Our model shows that the effect on PD loss depends on the  
551 way these extinction risks are distributed among clades: PD loss is increased by  $\eta > 1$  (*i.e.*,  
552 higher extinction risks in small clades; Fig. 6). Such a distribution of extinction risks may  
553 arise from subtrees having low species richness because of higher extinction rates, either  
554 due to intrinsic factors (species features that would make them more susceptible to  
555 extinction; *e.g.*, long generation time, or low variance or phenotypic plasticity of key  
556 ecological traits providing resistance to perturbations or evolutionary advantages in  
557 relation to biotic interactions; Purvis et al. 2000c; Johnson et al. 2002) or to extrinsic  
558 factors (threats affecting the spatial or ecological space shared by species of the subtree;  
559 *e.g.*, Russell et al. 1998; Hughes 1999; Purvis et al. 2000c; von Euler 2001; Johnson et al.

2002). Higher extinction risks in small subtrees could also be due to resource limitation affecting simultaneously the density of individuals and the diversity of species, and hence demographic stochasticity; or to stabilizing selection (*e.g.*, due to competition or to the absence of available spatial or ecological space in the surrounding environment), limiting adaptation and increasing species vulnerability in the face of perturbations (Purvis et al. 2000c; Purvis 2008).

In contrast,  $\eta < 1$  buffers the loss of phylogenetic diversity. Higher extinction risks in larger subtrees could result from a trade-off between species richness and average species abundance, provided constrained metacommunity size (with variation along this trade-off following for instance from landscape structure and dynamics, such as geographical isolation affecting the occurrence of allopatric speciation events), from recent speciation events associated with a decrease in average species abundance, geographical range or niche width, or from recent extinction events that removed the most extinction-prone species from certain clades (leaving the latter smaller and with less extinction-prone species; Schwartz and Simberloff 2001; Lozano and Schwartz 2005).

Hence,  $\eta$  is expected to vary across clades according to the metacommunity structure and the underpinning diversification dynamics. Given its striking effects on PD loss, this factor should also be accounted for to understand potential future losses of phylogenetic diversity.

### *Combined effects of $\beta$ , $\alpha$ and $\eta$ : reversing some expected patterns of PD loss*

The influence of  $\eta$  on the loss of PD is enhanced by  $\alpha < 0$  (small clades containing evolutionary distinct species) and  $\beta < 0$  (more variability in clade richness) (Fig. 6). However, a stronger clustering of extinction risks does not necessarily lead to higher loss of PD (*e.g.*, if extinctions occur first in richer subtrees—which contain more phylogenetic redundancy—as in the case when  $\alpha > 0$  and  $\eta < 1$ ).

585           These interactions between the effects of  $\beta$ ,  $\alpha$  and  $\eta$  may reverse two well-known  
586 patterns of variation in the loss of phylogenetic diversity (Nee and May 1997). First, the  
587 increase in PD loss with tree imbalance can be hampered by  $\eta$  values deviating from one  
588 (Fig. 7 and Appendix 7 available as Supplementary Material). In particular when  $\eta < 1$ ,  
589 this pattern results from the preferential extinction of phylogenetically redundant species  
590 in more unbalanced trees when extinction risks are clustered in large clades. Second, when  
591  $\eta > 1$  and  $\alpha < 0$  the loss of phylogenetic diversity proceeds faster than that of species  
592 diversity (turning their relationship from convex to concave, except in very balanced or  
593 very unbalanced trees; Fig. 6.C,E). This pattern is caused by the preferential extinction in  
594 small subtrees containing evolutionary distinct species. The only other cases where such  
595 high loss of PD is reached is when  $\beta < -1$  and  $\eta > 1$ . This led us to introduce the notion  
596 of ‘thin ice zone’, as the region of parameters ( $\beta < -1$  or  $\alpha < 0$ ;  $\eta > 1$ ) for which  
597 phylogenies are prone to a sudden collapse of PD.

### 598           *Loss of phylogenetic diversity in bird family phylogenies*

599           Our inference study shows that the phylogeny of bird families tend to exhibit  $\beta$   
600 values comprised between  $-1$  and  $0$ . A similar result was found in many  
601 macroevolutionary studies, commonly observing values of  $\beta$  clustering around  $-1$  in real  
602 phylogenies (*e.g.*, Guyer and Slowinski 1991; Heard 1992; Guyer and Slowinski 1993;  
603 Slowinski and Guyer 1993; Mooers 1995; Purvis 1996; Mooers and Heard 1997; Blum and  
604 François 2006). With these topologies, we expect both  $\alpha$  and  $\eta$  to play a major role in  
605 determining the potential losses of phylogenetic diversity (Fig. 6.E-F).

606           We observed  $\alpha$  values clustering around zero, consistently with several empirical  
607 studies that found no positive relation between clade depth and clade size (Ricklefs 2007b,  
608 2009, Rabosky et al. 2012; but see McPeck and Brown 2007). These values contrast with  
609 the value of  $1$  expected in Yule trees, and make phylogenies very sensitive to PD loss.

610 Our estimates of  $\eta$  values, based on the distribution of range sizes in bird family  
611 phylogenies, all fall between 1 and 1.5. This indicates that species in small clades tend to  
612 have smaller ranges than species in bigger clades. Range size has been shown to be one of  
613 the most important correlates of extinction risks and is one of the IUCN red list criteria  
614 (Purvis et al. 2000b; Cardillo et al. 2006; Lee and Jetz 2011; IUCN 2012; Arbetman et al.  
615 2017).

616 Considering the three parameters together, we find that bird family trees are  
617 situated close to the region of the parameter space termed ‘thin ice zone’, for which we find  
618 the loss of phylogenetic diversity to be at least as fast as the loss of species diversity. In  
619 particular, the combination of negative  $\alpha$  values with  $\eta > 1$  leads to higher extinction risks  
620 for evolutionary distinct species. We can expect such a pattern as a result from  
621 evolutionary mechanisms acting simultaneously on different features of trees. For example,  
622 subtree-specific susceptibility to extinction, or stabilizing selection generating relictual  
623 lineages, are both expected to beget small subtrees with high divergence times also  
624 endowed with high species extinction risks. This pattern has been already found for past  
625 extinctions in birds using a species level measure of evolutionary distinctiveness; the  
626 authors observed in that case a similar loss of species and phylogenetic diversity (von Euler  
627 2001; Szabo et al. 2012). Evolutionary distinct bird lineages were also shown to be more  
628 threatened by agricultural expansion and intensification than more recent lineages in Costa  
629 Rica (Frishkoff et al. 2014). This was also found in other taxa, such as marsupial mammals  
630 (Johnson et al. 2002) and *Sebastes* (Magnuson-Ford et al. 2009).

631 A striking result of our inference study relates to the narrow range of  $\alpha$  values  
632 obtained as soon as the trees are large enough for the inference to be accurate (see the  
633 online Appendix 9 available as Supplementary Material for inferred parameter values as a  
634 function of the tip number in the phylogenies). This value, which differs from what is found  
635 in birth-death models, adds a new a new puzzle concerning the shape of empirical trees.



636

## *Branch lengths in empirical phylogenies*

637

638

639

640

641

642

643

644

645

646

647

648

649

650

651

652

653

654

655

656

657

658

659

660

661

The parameter  $\alpha$  of the model shapes the order in which speciations take place, but does not instantiate the actual times between two consecutive speciation events, *i.e.*, edge lengths. In the numerical investigations of PD loss, we considered two models for edge lengths: the pure-birth process (Yule 1925), and the Kingman coalescent (Kingman 1982). Using either of these models did not affect our results qualitatively, but affected them quantitatively (compare Fig. 4 and 6 to Figures provided in Appendices 4 and 6, available as Supplementary Material). Our modeling framework allows easy exploration of predictions under different models of edge lengths. This is interesting as many empirical phylogenies are not time-calibrated, or imprecisely. Besides, empirical phylogenetic trees were shown to often exhibit a decrease in branching tempo, *i.e.*, in the rate of lineage accumulation through time (characterized in particular by estimates of the statistic  $\gamma < 0$ ; *e.g.*, Nee et al. 1992; Zink and Slowinski 1995; Lovette and Bermingham 1999; Pybus and Harvey 2000; Rüber and Zardoya 2005; Kozak et al. 2006; Seehausen 2006; Weir 2006; McPeck 2008; Phillimore and Price 2008; Rabosky and Lovette 2008; Jönsson et al. 2012). Hence, quantitative predictions on the loss of phylogenetic diversity in the face of species extinctions could be further increased by accounting for real branch lengths. Moreover, several theoretical studies suggested that the branching tempo of species trees may change with clade age, decreasing in particular in younger clades (the ‘out of equilibrium’ hypothesis, proposed to explain the negative values of  $\gamma$  often observed in real phylogenies; Liow et al. 2010; Gascuel et al. 2015; Manceau et al. 2015; Missa et al. 2016; Bonnet-Lebrun et al. 2017). Taking into account such correlations between the age of clades and their branching tempo would also affect the expected loss of phylogenetic diversity.

The EDGE program (‘Evolutionary Distinct and Globally Endangered’; Isaac et al. 2007) encourages conservation priorities aiming at preserving most evolutionary history within the Tree of Life, by proposing a ranking of species based on combined criteria of

662 evolutionary distinctiveness and extinction risk. Although our approach is not  
663 species-based but clade-based, it also investigates the preservation of evolutionary history  
664 based on principles linked to species evolutionary distinctiveness (related to the depths of  
665 subtrees, which depend on  $\alpha$ ) and to the distribution of extinction risks in the tree (which  
666 depends on  $\eta$ ). Accordingly, to conserve most evolutionary history and evolutionary  
667 potential for further diversification and/or survival, priority could be given to clades that  
668 would undergo higher loss of phylogenetic diversity in the face of species extinctions, *i.e.*,  
669 clades in the thin ice zone ( $\eta > 1$  and either  $\beta < -1$  or  $\alpha < 0$ ), and although not shown but  
670 only discussed herein, with  $\gamma < 0$  (decreasing branching tempo; Pybus and Harvey 2000).

### 671 *Beyond losses of phylogenetic diversity*

672 As we have seen earlier, the parameter  $\eta$  induces a sampling distribution on  
673 contemporary species, each species being drawn according to its frequency. In particular,  
674 our results could be interpreted in the light of rarefaction experiments (Nipperess and  
675 Matsen 2013), which study the way phylogenetic patterns in a metacommunity change as  
676 sampling decreases. Previous studies already pointed out strong impacts of non-random  
677 taxon sampling on the macroevolutionary patterns that we observe (*e.g.*, Cusimano and  
678 Renner 2010). Our results provide insights on the effects of non-random sampling on  
679 phylogenetic diversity and phylogenetic tree topology. They reveal how, when the rarer  
680 species are not known, the divergence between observed and real phylogenetic diversity  
681 depends on the ranked shape of species trees, and on the relationship between relative  
682 abundances and richness of clades (being larger in particular in the thin ice zone; Fig. 6.E);  
683 and how the divergence between observed and real tree shape depends on  $\eta$  (real trees  
684 being more imbalanced if  $\eta < 1$ , and diverging from Yule trees towards more balance or  
685 more imbalance if  $\eta > 1$ ; Fig. 8). These effects of incomplete sampling on  
686 macroevolutionary patterns should be particularly important to understand biodiversity

687 patterns in bacterial and archeal phyla, which remain poorly known in particular because  
688 they likely harbor rare species having high chances to remain unnoticed.

## 689 *Conclusion*

690 This new stochastic model of phylogenetic trees spans a large range of binary trees  
691 endowed with node rankings and species abundances/range sizes/extinction risks, based on  
692 three parameters only and interpolating other well-known one-parameter models. We  
693 showed that ranked tree shapes, non-random extinctions and the interactions thereof, may  
694 have a strong impact on the loss of phylogenetic diversity in the face of species extinctions,  
695 potentially reversing some expected patterns of variation in phylogenetic diversity. The  
696 simplicity of the model allows one to infer the parameters on empirical phylogenies.  
697 Applying our inference procedure on bird family phylogenies we found that, in this dataset,  
698 the parameters fall within a narrow range of the parameter space; and that the inferred  
699 values make the phylogenetic diversity of these trees very sensitive to species extinctions.

## 700 **ACKNOWLEDGMENTS**

701 The authors are very grateful to Mike Steel and Ana S.L. Rodrigues for their feedbacks on  
702 an earlier version of this manuscript. They also wish to warmly thank Arne Mooers for  
703 discussions and Walter Jetz for providing the data on bird range sizes. They thank the  
704 *Center for Interdisciplinary Research in Biology* (Collège de France, CNRS) for funding.

\*

705

706 References

707 Aldous, D. 1996. Probability distributions on cladograms. Pages 1–18 *in* Random Discrete  
708 Structures. (D. Aldous and R. Pemantle, eds.). Springer, New York.

709 Aldous, D. 2001. Stochastic models and descriptive statistics for phylogenetic trees, from  
710 Yule to today. *Stat. Sci.* 16:23–34.

711 Alexander, H. K., A. Lambert, and T. Stadler. 2015. Quantifying age-dependent extinction  
712 from species phylogenies. *Syst. Biol.* 65:35–50.

713 Arbetman, M. P., G. Gleiser, C. L. Morales, P. Williams, and M. A. Aizen. 2017. Global  
714 decline of bumblebees is phylogenetically structured and inversely related to species  
715 range size and pathogen incidence. *Proc. Roy. Soc. Lond. B* 284:20170204.

716 Baillie, J. E. M., C. Hilton-Taylor, and S. N. Stuart. 2004. A Global Species Assessment.  
717 IUCN, Gland, Switzerland.

718 Barnosky, A. D., N. Matzke, S. Tomiya, G. O. U. Wogan, B. Swartz, T. B. Quental,  
719 C. Marshall, J. L. McGuire, E. L. Lindsey, K. C. Maguire, B. Mersey, and E. A. Ferrer.  
720 2011. Has the Earth’s sixth mass extinction already arrived? *Nature* 471:51–57.

721 Barraclough, T. G. 2010. Evolving entities: towards a unified framework for understanding  
722 diversity at the species and higher levels. *Philos. Trans. R. Soc. Lond. B* 365:1801–1813.

723 Bennett, P. M. and I. P. F. Owens. 1997. Variation in extinction risk among birds: chance  
724 or evolutionary predisposition? *Proc. R. Soc. Lond. B.* 264:401–408.

725 Bertoin, J. 2002. Self-similar fragmentations. *Ann. I. H. Poincaré* 38:319–340.

- 726 Bertoin, J. 2006. Random Fragmentation and Coagulation Processes. Cambridge Univ.  
727 Press, Cambridge.
- 728 Bielby, J., A. A. Cunningham, and A. Purvis. 2006. Taxonomic selectivity in amphibians:  
729 ignorance, geography or biology? *Anim. Conserv.* 9:135–143.
- 730 Blum, M. and O. François. 2006. Which random processes describe the tree of life? A  
731 large-scale study of phylogenetic tree imbalance. *Syst. Biol.* 55:685–691.
- 732 Bokma, F. 2003. Testing for equal rates of cladogenesis in diverse taxa. *Evolution*  
733 57:2469–2474.
- 734 Bonnet-Lebrun, A.-S., A. Manica, A. Eriksson, and A. S. Rodrigues. 2017. Empirical  
735 phylogenies and species abundance distributions are consistent with preequilibrium  
736 dynamics of neutral community models with gene flow. *Evolution* 71:1149–1163.
- 737 Bortolussi, N., E. Durand, M. Blum, and O. François. 2006. apTreeshape: statistical  
738 analysis of phylogenetic tree shape. *Bioinformatics* 22:363–364.
- 739 Cardillo, M., G. M. Mace, J. L. Gittleman, and A. Purvis. 2006. Latent extinction risk and  
740 the future battlegrounds of mammal conservation. *Proc. Roy. Soc. Lond. B*  
741 103:4157–4161.
- 742 Colwell, R. K. and D. C. Lees. 2000. The mid-domain effect: geometric species richness.  
743 *Trends Ecol. Evol.* 15:70–76.
- 744 Cusimano, N. and S. S. Renner. 2010. Slowdowns in diversification rates from real  
745 phylogenies may not be real. *Syst. Biol.* 59:458–464.
- 746 Cusimano, N., T. Stadler, and S. S. Renner. 2012. A new method for handling missing  
747 species in diversification analysis applicable to randomly or nonrandomly sampled  
748 phylogenies. *Syst. Biol.* 61:785–792.

- 749 Davies, T. J. and K. Yessoufou. 2013. Revisiting the impacts of non-random extinction on  
750 the Tree-of-Life. *Biol. Lett.* 9:20130343.
- 751 Ewens, W. J. 2012. *Mathematical Population Genetics 1: Theoretical Introduction*.  
752 Springer Science & Business Media.
- 753 Faith, D. P. 1992. Conservation evaluation and phylogenetic diversity. *Biol. Conserv.*  
754 61:1–10.
- 755 Fallner, B., F. Pardi, and M. Steel. 2008. Distribution of phylogenetic diversity under  
756 random extinction. *J. Theor. Biol.* 251:286–296.
- 757 Feng, S. 2010. *The Poisson-Dirichlet Distribution and Related Topics: Models and*  
758 *Asymptotic Behaviors*. Springer Science & Business Media.
- 759 Forest, F. 2009. Calibrating the tree of life: Fossils, molecules and evolutionary timescales.  
760 *Ann. Bot.* 104:789–794.
- 761 Frishkoff, L. O., D. S. Karp, L. K. M'Gonigle, C. D. Mendenhall, J. Zook, C. Kremen,  
762 E. A. Hadly, and G. C. Daily. 2014. Loss of avian phylogenetic diversity in neotropical  
763 agricultural systems. *Science* 345:1343–1346.
- 764 Fritz, S. A. and A. Purvis. 2010. Selectivity in mammalian extinction risk and threat types:  
765 a new measure of phylogenetic signal strength in binary traits. *Conserv. Biol.*  
766 24:1042–1051.
- 767 Gascuel, F., R. Ferriere, R. Aguilée, and A. Lambert. 2015. How ecology and landscape  
768 dynamics shape phylogenetic trees. *Syst. Biol.* 64:590–607.
- 769 Glavin, T. 2007. *The Sixth Extinction: Journeys Among the Lost and Left Behind*.  
770 Thomas Dunne Books, New York.

- 771 Guyer, C. and J. B. Slowinski. 1991. Comparisons of observed phylogenetic topologies with  
772 null expectations among three monophyletic lineages. *Evolution* 45:340–350.
- 773 Guyer, C. and J. B. Slowinski. 1993. Adaptive radiation and the topology of large  
774 phylogenies. *Evolution* 47:253–263.
- 775 Hagen, O., K. Hartmann, M. Steel, and T. Stadler. 2015. Age-dependent speciation can  
776 explain the shape of empirical phylogenies. *Systematic biology* 64:432–440.
- 777 Heard, S. B. 1992. Patterns in tree balance among cladistic, phenetic, and randomly  
778 generated phylogenetic trees. *Evolution* 46:1818–1826.
- 779 Heath, T. A., S. M. Hedtke, and D. M. Hillis. 2008. Taxon sampling and the accuracy of  
780 phylogenetic analyses. *J. Syst. Evol.* 46:239–257.
- 781 Hubbell, S. 2001. *The Unified Neutral Theory of Biodiversity and Biogeography*. Princeton  
782 Univ. Press, Princeton, NJ.
- 783 Hughes, A. L. 1999. Differential human impact on the survival of genetically distinct avian  
784 lineages. *Bird Conserv. Int.* 9:147–154.
- 785 Isaac, N. J. B., S. T. Turvey, B. Collen, C. Waterman, and J. E. M. Baillie. 2007. Mammals  
786 on the EDGE: conservation priorities based on threat and phylogeny. *PLoS ONE* 2:e296.
- 787 IUCN. 2012. *IUCN Red List Categories and Criteria: Version 3.1*. February 2 ed. IUCN,  
788 Gland, Switzerland.
- 789 Jetz, W., G. Thomas, J. Joy, K. Hartmann, and A. Mooers. 2012. The global diversity of  
790 birds in space and time. *Nature* 491:444–448.
- 791 Johnson, C. N., S. Delean, and A. Balmford. 2002. Phylogeny and the selectivity of  
792 extinction in Australian marsupials. *Anim. Conserv.* 5:135–142.

- 793 Johnson, S. G. and B. Narasimhan. 2013. R package "cubature": adaptive multivariate  
794 integration over hypercubes.  
795 <https://cran.r-project.org/web/packages/cubature/index.html> .
- 796 Jønsson, K. A., P.-h. Fabre, S. A. Fritz, R. S. Etienne, R. E. Ricklefs, and T. B. Jørgensen.  
797 2012. Ecological and evolutionary determinants for the adaptive radiation of the  
798 Madagascan vangas. *Proc. Natl. Acad. Sci. USA* 109:6620–6625.
- 799 Kembel, S. W., D. D. Ackerly, S. P. Blomberg, W. K. Cornwell, P. D. Cowan, M. R.  
800 Helmus, H. Morlon, and C. O. Webb. 2014. R package "picante": R tools for integrating  
801 phylogenies and ecology. <https://cran.r-project.org/web/packages/picante/index.html> .
- 802 Kingman, J. F. C. 1982. The coalescent. *Stoch. Proc. Appl.* 13:235–248.
- 803 Kirkpatrick, M. and M. Slatkin. 1993. Searching for evolutionary patterns in the shape of a  
804 phylogenetic tree. *Evolution* 47:1171–1181.
- 805 Kozak, K. H., D. W. Weisrock, and A. Larson. 2006. Rapid lineage accumulation in a  
806 non-adaptive radiation: phylogenetic analysis of diversification rates in eastern North  
807 American woodland salamanders (Plethodontidae: Plethodon). *Proc. R. Soc. Lond. B.*  
808 273:539–546.
- 809 Kumar, S. 2005. Molecular clocks: four decades of evolution. *Nat. Rev. Genet.* 6:654–662.
- 810 Lambert, A. and T. Stadler. 2013. Birth-death models and coalescent point processes: The  
811 shape and probability of reconstructed phylogenies. *Theor. Popul. Biol.* 90:113–128.
- 812 Lambert, A. and M. Steel. 2013. Predicting the loss of phylogenetic diversity under  
813 non-stationary diversification models. *J. Theor. Biol.* 337:111–124.
- 814 Lambert, A. et al. 2017. Probabilistic models for the (sub) tree (s) of life. *Braz. J. Probab.*  
815 *Stat.* 31:415–475.



- 816 Leakey, R. E. and R. Lewin. 1995. *The Sixth Extinction: Patterns of Life and the Future of*  
817 *Humankind*. Doubleday, New York.
- 818 Lee, T. M. and W. Jetz. 2011. Unravelling the structure of species extinction risk for  
819 predictive conservation science. *Proc. Roy. Soc. Lond. B* .
- 820 Liow, L. H., T. B. Quental, and C. R. Marshall. 2010. When can decreasing diversification  
821 rates be detected with molecular phylogenies and the fossil record? *Syst. Biol.*  
822 59:646–659.
- 823 Lovette, I. J. and E. Bermingham. 1999. Explosive speciation in the New World *Dendroica*  
824 warblers. *Proc. R. Soc. Lond. B*. 266:1629–1636.
- 825 Lozano, F. D. and M. W. Schwartz. 2005. Patterns of rarity and taxonomic group size in  
826 plants. *Biol. Conserv.* 126:146–154.
- 827 MacArthur, R. and E. Wilson. 1967. *The Theory of Island Biogeography*. Princeton Univ.  
828 Press, Princeton, NJ.
- 829 MacArthur, R. H. 1957. On the relative abundance of bird species. *Proc. Natl. Acad. Sci.*  
830 USA 43:293–295.
- 831 Magallon, S. and M. J. Sanderson. 2001. Absolute diversification rates in Angiosperm  
832 clades. *Evolution* 55:1762–1780.
- 833 Magnuson-Ford, K., T. Ingram, D. W. Redding, and A. Ø. Mooers. 2009. Rockfish  
834 (sebastes) that are evolutionarily isolated are also large, morphologically distinctive and  
835 vulnerable to overfishing. *Biol. Conserv.* 142:1787–1796.
- 836 Manceau, M., A. Lambert, and H. Morlon. 2015. Phylogenies support out-of-equilibrium  
837 models of biodiversity. *Ecol. Lett.* 18:347–356.

- 838 McKinney, M. L. 1997. Extinction vulnerability and selectivity: combining ecological and  
839 paleontological views. *Annu. Rev. Ecol. Syst.* 28:495–516.
- 840 McPeck, M. A. 2008. The ecological dynamics of clade diversification and community  
841 assembly. *Am. Nat.* 172:E270–E284.
- 842 McPeck, M. A. and J. M. Brown. 2007. Clade age and not diversification rate explains  
843 species richness among animal taxa. *Am. Nat.* 169:E97–106.
- 844 Missa, O., C. Dytham, and H. Morlon. 2016. Understanding how biodiversity unfolds  
845 through time under neutral theory. *Philos. Trans. R. Soc. Lond. B* 371:1–12.
- 846 Mooers, A., O. Gascuel, T. Stadler, H. Li, and M. Steel. 2012. Branch lengths on  
847 birth-death trees and the expected loss of phylogenetic diversity. *Syst. Biol.* 61:195–203.
- 848 Mooers, A. and S. Heard. 1997. Inferring evolutionary process from phylogenetic tree  
849 shape. *Q. Rev. Biol.* 72:31–54.
- 850 Mooers, A. O. 1995. Tree balance and tree completeness. *Evolution* 49:379–384.
- 851 Nee, S. 2006. Birth-death models in macroevolution. *Annu. Rev. Ecol. Evol. Syst.* 37:1–17.
- 852 Nee, S. and R. M. May. 1997. Extinction and the loss of evolutionary history. *Science*  
853 278:692–694.
- 854 Nee, S., A. O. Mooers, and P. H. Harvey. 1992. Tempo and mode of evolution revealed  
855 from molecular phylogenies. *Proc. Natl. Acad. Sci. USA* 89:8322–8326.
- 856 Nipperess, D. A. and F. A. Matsen. 2013. The mean and variance of phylogenetic diversity  
857 under rarefaction. *Methods in Ecology and Evolution* 4:566–572.
- 858 Paradis, E., J. Claude, and K. Strimmer. 2004. APE: analyses of phylogenetics and  
859 evolution in R language. *Bioinformatics* 20:289–290.

- 860 Parhar, R. K. and A. Ø. Mooers. 2011. Phylogenetically clustered extinction risks do not  
861 substantially prune the tree of life. PLoS One 6:e23528.
- 862 Phillimore, A. B. and T. D. Price. 2008. Density-dependent cladogenesis in birds. PLoS  
863 Biol. 6:e71.
- 864 Prado, P. I., M. D. Miranda, and A. Chalom. 2015. R package "sads": maximum likelihood  
865 models for species abundance distributions.  
866 <http://search.r-project.org/library/sads/html/fitsad.html> .
- 867 Pulquério, M. J. F. and R. A. Nichols. 2007. Dates from the molecular clock: how wrong  
868 can we be? Trends Ecol. Evol. 22:180–184.
- 869 Purvis, A. 1996. Using interspecies phylogenies to test macroevolutionary hypotheses.  
870 Pages 153–168 *in* New Uses for New Phylogenies. (P. Harvey, A. Leigh Brown,  
871 J. Maynard Smith, and S. Nee, eds.). Oxford Univ. Press, Oxford.
- 872 Purvis, A. 2008. Phylogenetic approaches to the study of extinction. Annu. Rev. Ecol.  
873 Evol. Syst. 39:301–319.
- 874 Purvis, A., P.-M. Agapow, J. L. Gittleman, and G. M. Mace. 2000a. Nonrandom extinction  
875 and the loss of evolutionary history. Science 288:328–330.
- 876 Purvis, A., J. L. Gittleman, G. Cowlishaw, and G. M. Mace. 2000b. Predicting extinction  
877 risk in declining species. Proc. Roy. Soc. Lond. B 267:1947–1952.
- 878 Purvis, A., K. E. Jones, and G. M. Mace. 2000c. Extinction. BioEssays 22:1123–1133.
- 879 Pybus, O. G. and P. H. Harvey. 2000. Testing macro-evolutionary models using incomplete  
880 molecular phylogenies. Proc. R. Soc. Lond. B. 267:2267–2272.

- 881 R Development Core Team. 2012. R: A Language and Environment for Statistical  
882 Computing. {R Foundation for Statistical Computing}, Vienna, Austria.
- 883 Rabosky, D. L. 2009. Ecological limits and diversification rate: alternative paradigms to  
884 explain the variation in species richness among clades and regions. *Ecol. Lett.*  
885 12:735–743.
- 886 Rabosky, D. L. 2013. Diversity-dependence, ecological speciation, and the role of  
887 competition in macroevolution. *Annu. Rev. Ecol. Evol. Syst.* 44:481–502.
- 888 Rabosky, D. L., S. C. Donnellan, A. L. Talaba, and I. J. Lovette. 2007. Exceptional  
889 among-lineage variation in diversification rates during the radiation of Australia’s most  
890 diverse vertebrate clade. *Proc. R. Soc. Lond. B.* 274:2915–2923.
- 891 Rabosky, D. L. and I. J. Lovette. 2008. Density-dependent diversification in North  
892 American wood warblers. *Proc. R. Soc. Lond. B.* 275:2363–2371.
- 893 Rabosky, D. L., G. J. Slater, and M. E. Alfaro. 2012. Clade age and species richness are  
894 decoupled across the eukaryotic Tree of Life. *PLoS Biol.* 10:e1001381.
- 895 Raup, D. M., S. J. Gould, T. J. M. Schopf, and D. S. Simberloff. 1973. Stochastic models of  
896 phylogeny and the evolution of diversity. *J. Geol.* 81:525–542.
- 897 Redding, D. W. and A. Ø. Mooers. 2006. Incorporating evolutionary measures into  
898 conservation prioritization. *Conserv. Biol.* 20:1670–1678.
- 899 Ricklefs, R. 2009. Speciation, extinction and diversity. Pages 257–277 *in* *Speciation and*  
900 *Patterns of Diversity*. (R. Butlin, J. Bridle, and D. Schluter, eds.). Cambridge University  
901 Press, Cambridge.
- 902 Ricklefs, R. E. 2006. Global variation in the diversification rate of passerine birds. *Ecology*  
903 87:2468–78.

- 904 Ricklefs, R. E. 2007a. Estimating diversification rates from phylogenetic information.  
905 Trends Ecol. Evol. 22:601–610.
- 906 Ricklefs, R. E. 2007b. History and diversity: explorations at the intersection of ecology and  
907 evolution. Am. Nat. 170:S56–S70.
- 908 Rüber, L. and R. Zardoya. 2005. Rapid cladogenesis in marine fishes revisited. Evolution  
909 59:1119–1127.
- 910 Russell, G. J., T. M. Brooks, M. M. McKinney, and C. G. Anderson. 1998. Present and  
911 future taxonomic selectivity in bird and mammal extinctions. Conserv. Biol.  
912 12:1365–1376.
- 913 Sainudiin, R. and A. Véber. 2016. A beta-splitting model for evolutionary trees. Royal Soc.  
914 Open Sci. 3:160016.
- 915 Schwartz, M. W. and D. Simberloff. 2001. Taxon size predicts rates of rarity in vascular  
916 plants. Ecol. Lett. Pages 464–469.
- 917 Schwartz, R. S. and R. L. Mueller. 2010. Branch length estimation and divergence dating:  
918 estimates of error in Bayesian and maximum likelihood frameworks. BMC Evol. Biol.  
919 10:1–21.
- 920 Seehausen, O. 2006. African cichlid fish: a model system in adaptive radiation research.  
921 Proc. R. Soc. Lond. B. 273:1987–1998.
- 922 Slowinski, J. and C. Guyer. 1993. Testing whether certain traits have caused amplified  
923 diversification - an improved method based on a model of random speciation and  
924 extinction. Am. Nat. 142:1019–1024.
- 925 Stadler, T. 2013. Recovering speciation and extinction dynamics based on phylogenies. J.  
926 Evol. Biol. 26:1203–1219.

- 927 Stadler, T., D. L. Rabosky, R. E. Ricklefs, and F. Bokma. 2014. On age and species  
928 richness of higher taxa. *Am. Nat.* 184:447–455.
- 929 Szabo, J. K., N. Khwaja, S. T. Garnett, and S. H. Butchart. 2012. Global patterns and  
930 drivers of avian extinctions at the species and subspecies level. *PloS one* 7:e47080.
- 931 Van Valen, L. 1976. Ecological species, multispecies, and oaks. *Taxon* 25:233–239.
- 932 Vazquez, D. P. and J. L. Gittleman. 1998. Biodiversity conservation: does phylogeny  
933 matter? *Curr. Biol.* 8:379–381.
- 934 Veron, S., T. J. Davies, M. W. Cadotte, P. Clergeau, and S. Pavoine. 2015. Predicting loss  
935 of evolutionary history: Where are we? *Biol Rev* 0:0–0.
- 936 von Euler, F. 2001. Selective extinction and rapid loss of evolutionary history in the bird  
937 fauna. *Proc. R. Soc. Lond. B.* 268:127–130.
- 938 Wake, D. B. and V. T. Vredenburg. 2008. Are we in the midst of the sixth mass extinction?  
939 A view from the world of amphibians. *Proc. Natl. Acad. Sci. USA* 105:11466–11473.
- 940 Weir, J. T. 2006. Divergent timing and patterns of species accumulation in lowland and  
941 highland neotropical birds. *Evolution* 60:842–855.
- 942 Welch, J. J. and L. Bromham. 2005. Molecular dating when rates vary. *Trends Ecol. Evol.*  
943 20:320–327.
- 944 Yule, G. 1925. A mathematical theory of evolution, based on the conclusions of Dr. J. C.  
945 Willis, F.R.S. *Philos. Trans. R. Soc. Lond. B* 213:402–410.
- 946 Zink, R. and J. Slowinski. 1995. Evidence from molecular systematics for decreased avian  
947 diversification in the Pleistocene Epoch. *Proc. Natl. Acad. Sci. USA* 92:5832–5835.
